# Supplementary material for: A hexaphenylbenzene based AIEE active probe for the preparation of ferromagnetic α-Fe2O3 nanoparticles: facile synthesis and catalytic applications
Source: Royal Society of Chemistry journal article supplement (doi:10.1039/c4cc05460a), 2014-01-01

**Electronic Supplementary Information**

**Hexaphenylbenzene based AIEE active probe for the  
preparation of ferromagnetic  $\alpha$ -Fe<sub>2</sub>O<sub>3</sub> nanoparticles:  
Facile Synthesis and catalytic applications**

Subhamay Pramanik, Vandana Bhalla\* and Manoj Kumar\*

*Department of Chemistry, UGC Sponsored Centre for Advanced Studies-1, Guru Nanak Dev  
University, Amritsar 143005, and Punjab, India*

[vanmanan@yahoo.co.in](mailto:vanmanan@yahoo.co.in), [mksharmaa@yahoo.co.in](mailto:mksharmaa@yahoo.co.in)

- S4-S5** General Experimental Procedures.
- S6** Synthesis of  $\alpha$ -Fe<sub>2</sub>O<sub>3</sub> nanoparticles and catalysis in photo degradation the aqueous solution Rhodamine B (RhB) dye and C-C Sonogashira-Hagihara coupling reactions.
- S7** Synthetic route and characteristic data of compound **3**.
- S8-S9** Comparison of present synthesis method over other reported procedure in literature for the preparation of ferromagnetic  $\alpha$ -Fe<sub>2</sub>O<sub>3</sub> nanoparticles.
- S10** Comparison of present probe **3** for Fe<sup>3+</sup> ions detection over other reported chemosensors for Fe<sup>3+</sup> ion reported in the literature.
- S11** Comparison of present method over other reported procedure in literature for the C-C Sonogashira coupling reactions by  $\alpha$ -Fe<sub>2</sub>O<sub>3</sub>/other iron oxide nanoparticles prepared by derivative **3**.
- S12** Comparison of present method over other reported procedure in literature for photocatalytic degradation Rhodamine B (RhB) dye by ferromagnetic  $\alpha$ -Fe<sub>2</sub>O<sub>3</sub> nanoparticles prepared by derivative **3**.
- S13** Comparison of catalytic activity  $\alpha$ -Fe<sub>2</sub>O<sub>3</sub> nanoparticles for the Sonogashira coupling reactions over other noble metal catalysts like Pd, Au, Ag, Ru etc. reported in the literature.
- S14** UV-vis and fluorescence spectra of **3** in the presence of in different percentage of water in ethanol.

- S15** Fluorescence spectra of **3** at different concentration in Ethanol.
- S16** Fluorescence spectra of **3** in the presence of in different percentage TEG in Ethanol and Variation in quantum yield value with the variation of water fractions in ethanol solution of derivative **3**.
- S17** Time resolved fluorescence decays of **3** with increasing water fraction upto 70% and the table showing the radiative, non-radiative decay rate constants.
- S18** Concentration dependent  $^1\text{H}$  NMR spectra of compound **3** in DMSO- $\text{d}_6$ .
- S19** Graphical representation of rate constant of formation of  $\alpha\text{-Fe}_2\text{O}_3$  nanoparticles.
- S20** UV-vis spectra of compound **3** upon additions of various metal ions as their perchlorate and chloride salt in  $\text{H}_2\text{O}/\text{EtOH}$  (7:3, v/v).
- S21** UV-vis spectral changes of **3** on addition of  $\text{Fe}^{3+}$  ions at different pH; the effect of pH on the UV-vis spectrum of **3**.
- S22** Plot of fluorescence quenching efficiency of the ratiometric probe **3** as a function of the  $\text{Fe}^{3+}$  ions concentration.
- S23** Detection limit of  $\text{Fe}^{3+}$  by using compound **3** in  $\text{H}_2\text{O}/\text{EtOH}$  (7:3, v/v).
- S24** Competitive and selectivity graph of derivative **3** towards various metal ions as their perchlorate and chloride salt in  $\text{H}_2\text{O}/\text{EtOH}$  (7:3, v/v).
- S25** Time resolved fluorescence decays of **3** in  $\text{H}_2\text{O}/\text{EtOH}$  (7:3, v/v) mixture on addition of  $\text{Fe}^{3+}$  ions.
- S26** Photographs of fluorescence response of derivative **3** coated fluorescent paper strip in presence of aqueous solution of  $\text{Fe}^{3+}$ .
- S27** Overlay  $^1\text{H}$  NMR spectra of **3** and  $\alpha\text{-Fe}_2\text{O}_3$  nanoparticles of **3** after filtration with THF.
- S28** Photographs of SEM images of aggregates of **3** in presence of  $\text{Fe}^{3+}$  ions. TEM images of  $\alpha\text{-Fe}_2\text{O}_3$  nanoparticles and size distribution bar diagram.
- S29** EDX spectra and XRD pattern of  $\alpha\text{-Fe}_2\text{O}_3$ -nanoparticles.
- S30** Dynamic light scattering (DLS) results showing the particle size diameter of the aggregates of **3** in  $\text{H}_2\text{O}/\text{EtOH}$  (7:3, v/v) mixture and  $\alpha\text{-Fe}_2\text{O}_3$  nanoparticles.

- S31** FT-IR spectrum of  $\alpha$ -Fe<sub>2</sub>O<sub>3</sub> nanoparticles.
- S32** The magnetic hysteresis loop of  $\alpha$ -Fe<sub>2</sub>O<sub>3</sub> nanorods at room temperature.
- S33** UV-vis spectrum showing the photo catalytic degradation of RhB solutions (0.1 mM) in the presence of  $\alpha$ -Fe<sub>2</sub>O<sub>3</sub> nanoparticle (2  $\mu$ M) with 2 mM H<sub>2</sub>O<sub>2</sub> and the rate constant of photo catalytic degradation of RhB dye by  $\alpha$ -Fe<sub>2</sub>O<sub>3</sub> nanoparticles.
- S34** Catalytic application of  $\alpha$ -Fe<sub>2</sub>O<sub>3</sub> nanoparticles in palladium, CuI and amine free Sonogashira cross coupling reactions.
- S35-S36** Comparison of catalytic activity  $\alpha$ -Fe<sub>2</sub>O<sub>3</sub> nanoparticles for the mentioned Sonogashira coupling reactions over other reported procedure in literature.
- S37** <sup>1</sup>H and <sup>13</sup>C NMR of spectrum of 5a.
- S38** ESI-MS spectrum of 5a.
- S39** <sup>1</sup>H and <sup>13</sup>C NMR of spectrum of 5b.
- S40** ESI-MS spectrum of 5b.
- S41** <sup>1</sup>H NMR of spectrum of derivative **3**.
- S42** <sup>13</sup>C NMR of spectrum of derivative **3**.
- S43** ESI-MS spectrum of derivative **3**.
- S44** FT-IR spectrum of compound **3**.

**General Experimental Procedures:**

**Materials and reagents:** All reagents were purchased from Aldrich and were used without further purification. THF was dried over sodium and benzophenone as an indicator. UV-vis studies were performed in THF, absolute ethanol, distilled water and HEPES buffer (0.05 M) (pH = 7.05).

**Instrumentation:** UV-vis spectra were recorded on a SHIMADZU UV-2450 spectrophotometer, with a quartz cuvette (path length, 1 cm). The cell holder was thermostatted at 25°C. The fluorescence spectra were recorded with a SHIMADZU-5301 PC spectrofluorimeter. UV-vis spectra were recorded on Shimadzu UV-2450PC spectrophotometer with a quartz cuvette (path length: 1 cm). The cell holder was thermostatted at 25 °C. The scanning electron microscope (SEM) images were obtained with a field-emission scanning electron microscope (SEM CARL ZEISS SUPRA 55). The TEM mages was recorded from Transmission Electron Microscope (TEM) - JEOL 2100F. The FT-IR spectra were recorded with VARIAN 660 IR Spectrometer. The dynamic light scattering (DLS) data were recorded with MALVERN Instruments (Nano-ZS). The Time resolved fluorescence spectra were recorded with a HORIBA Time Resolved Fluorescence Spectrometer. Elemental analysis was done using a Flash EA 1112 CHNS/O analyzer from Thermo Electron Corporation. <sup>1</sup>H and <sup>13</sup>C NMR spectra were recorded on a BRUKER-AVANCE-II FT-NMR-AL400 MHz and 500 MHz spectrophotometer using CDCl<sub>3</sub>, DMSO-d<sub>6</sub>, D<sub>2</sub>O as solvent and tetramethylsilane, SiMe<sub>4</sub> as internal standards. Data are reported as follows: chemical shifts in ppm (1), multiplicity (s = singlet, br = broad signal, d = doublet, t = triplet, m = multiplet), coupling constants *J* (Hz), integration and interpretation. Silica gel 60 (60–120 mesh) was used for column chromatography.

**Quantum yield calculations:** Fluorescence quantum yield was determined by using optically matching solution of diphenylanthracene ( $\Phi_{fr} = 0.90$  in cyclohexane) as standard at an excitation wavelength of 373 nm and quantum yield is calculated using the equation:

$$\Phi_{fs} = \Phi_{fr} \times \frac{1-10^{-A_r L_r}}{1-10^{-A_s L_s}} \times \frac{N_s^2}{N_r^2} \times \frac{D_s}{D_r}$$

$\Phi_{fs}$  and  $\Phi_{fr}$  are the radiative quantum yields of sample and the reference respectively,  $A_s$  and  $A_r$  are the absorbance of the sample and the reference respectively,  $D_s$  and  $D_r$  the respective areas of emission for sample and reference.  $L_s$  and  $L_r$  are the lengths of the absorption cells of sample and reference respectively.  $N_s$  and  $N_r$  are the refractive indices of the sample and reference solutions (pure solvents were assumed respectively).

**UV-vis and fluorescence titrations:** The concentration of HEPES buffer (pH = 7.05) is 0.05 M. For each experiment we have taken 3 ml solution which contains solution of derivative **3** in 15  $\mu$ l of THF diluted with 885  $\mu$ l of EtOH and 2.1 ml HEPES buffer (0.05 M, pH = 7.05) or double distilled water. UV-vis and fluorescence titrations were performed with 5.0  $\mu$ M solutions of ligand (15  $\mu$ l of THF are used to dissolve) in H<sub>2</sub>O/EtOH (7:3, v/v). Typically, aliquots of freshly prepared standard solutions ( $10^{-1}$ M to  $10^{-3}$ M) of metal ions such as Zn<sup>2+</sup>, Hg<sup>2+</sup>, Cu<sup>2+</sup>, Fe<sup>2+</sup>, Fe<sup>3+</sup>, Co<sup>2+</sup>, Pb<sup>2+</sup>, Ni<sup>2+</sup>, Cd<sup>2+</sup>, Ag<sup>+</sup>, Ba<sup>2+</sup>, Al<sup>3+</sup>, Mg<sup>2+</sup>, K<sup>+</sup> and Na<sup>+</sup> ions as their perchlorate [M(ClO<sub>4</sub>)<sub>x</sub>; X = 1-3]/chloride [M(Cl)<sub>x</sub>; X = 1-3] in EtOH were added to record the UV-vis and fluorescence spectra.

### **Synthesis of $\alpha$ -Fe<sub>2</sub>O<sub>3</sub> Nanoparticles:**

Aqueous solution of 0.1 M FeCl<sub>3</sub> (150  $\mu$ L) was added to a 3 ml solution of compound **3** (0.2 mM) in H<sub>2</sub>O/EtOH (7:3, v/v). The reaction was stirred at room temperature for 30 min and formations of nanoparticles take place. These nanoparticles solution was used as such in the catalytic experiment.

### **Measurement of photo catalytic degradation Rhodamine B (RhB) dye by $\alpha$ -Fe<sub>2</sub>O<sub>3</sub> Nanoparticles:**

The photocatalytic activity of the as-prepared samples was evaluated by photocatalytic degradation of RhB pollutants at room temperature. The experimental procedures were performed as follows. 3 mL of  $5 \times 10^{-5}$  M RhB aqueous solution, 30  $\mu$ L of 2 mM H<sub>2</sub>O<sub>2</sub> and 5  $\mu$ L (2  $\mu$ M) of  $\alpha$ -Fe<sub>2</sub>O<sub>3</sub> nanoparticles of derivative **3** were mixed. After stirring the reaction mixture for 26 min, fully colour change of the reaction mixture from pink to colourless was observed which indicate the degradation Rhodamine B.

### **C-C cross coupling via the Sonogashira-Hagihara reaction by $\alpha$ -Fe<sub>2</sub>O<sub>3</sub> Nanoparticles:**

Here, we use  $\alpha$ -Fe<sub>2</sub>O<sub>3</sub> Nanoparticles (<20 nm) as an efficient catalyst for carbon-carbon bond formation via the Sonogashira-Hagihara reaction under palladium, copper and amine-free conditions using ethylene glycol (EG) as a solvent and K<sub>2</sub>CO<sub>3</sub> as a base. The effect of different solvents upon the reaction of aryl-iodide (**4a-b**, 1 mmol) with phenylacetylene (100 mg, 1 mmol) as a model reaction in the presence of K<sub>2</sub>CO<sub>3</sub> (276 mg, 2 mmol) and 5 mol% of the Nano catalyst ( $\alpha$ -Fe<sub>2</sub>O<sub>3</sub>) at 80°C was studied (Table 1). The results show that ethylene glycol (EG) is a suitable solvent for the reaction. EG possesses negligible vapour pressure, is thermally stable, and is not so expensive with a low toxicity. Ethylene glycol is highly soluble in water, and can be easily separated from the organic phase by addition of water to the reaction mixture. The products (**5a-b**) are purified by Silica gel 60 (60-120 mesh) and the isolated yield has been given.

### Synthetic scheme of compound 3:

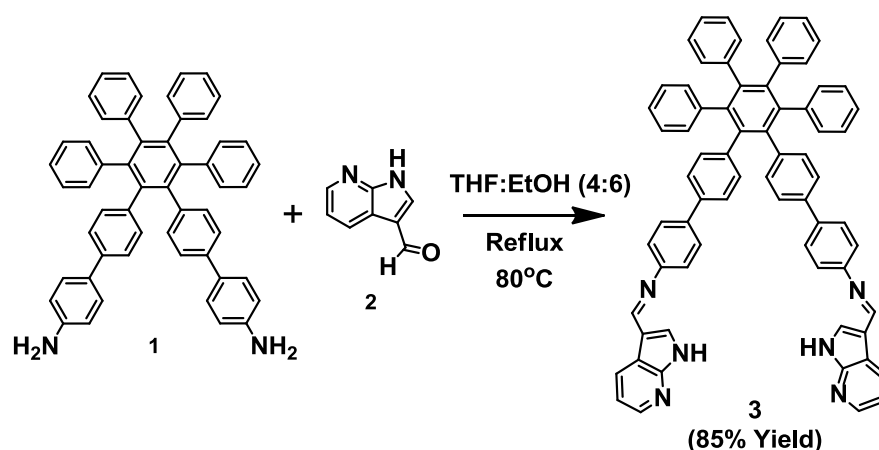

**Scheme 1.** Synthesis of hexaphenylbenzene based derivative **3**.

### Synthesis of compound 3:

A clear solution of compound **1** (0.05 g, 0.07 mmol) and **2**, 7-azaindole-3-carboxaldehyde **2** (0.023 g, 0.15 mmol) in dry THF:MeOH (4:6) was stirred at 80°C. After 24 h, the reaction mixture turned turbid. The reaction mixture was concentrated under the reduced pressure and dry methanol was poured into it, solid appears. The solid was filtered and recrystallized from methanol to afford the light yellow coloured compound **3** (0.058 g, 85%); mp: >280°C (Scheme 1). The structure of compound **3** was confirmed from its spectroscopic and analytical data (Fig. S26-S29, ESI†). <sup>1</sup>H NMR (400 MHz, DMSO-d<sub>6</sub>, ppm) δ = 12.36 (s, 2H, -NH), 9.46 (s, 2H, -HC=N), 8.74 (s, 2H, ArH), 8.69 (d, *J* = 8 Hz, 2H, ArH), 8.54 (s, 2H, ArH), 8.48-8.38 (m, 4H, ArH), 8.19 (s, 2H, ArH), 7.58 (s, 2H, ArH), 7.34 (d, *J* = 8 Hz, 2H, ArH), 7.26 (d, *J* = 8 Hz, 4H, ArH), 7.15 (t, *J* = 8 Hz, 8H, ArH), 7.06 (d, *J* = 8 Hz, 4H, ArH), 6.95-6.91 (m, 10H, ArH), 6.56 (d, *J* = 8 Hz, 2H, ArH). <sup>13</sup>C NMR (100 MHz, DMSO-d<sub>6</sub>, ppm) δ = 161.10, 156.26, 150.55, 145.89, 143.82, 140.21, 139.94, 139.69, 135.77, 135.12, 131.42, 131.08, 130.81, 127.15, 126.26, 126.16, 124.80, 123.95, 117.37, 116.22, 114.88. ESI-MS mass spectrum of compound **3** showed a parent ion peak, *m/z* = 973.3970 [M+H]<sup>+</sup> and fragmentation peaks *m/z* = 845.3595 [A+H]<sup>+</sup> and *m/z* = 717.3265 [B+H]<sup>+</sup>. The FT-IR spectrum of compound **3** showed stretching band at 1621 cm<sup>-1</sup> corresponding to -HC=N group and 3382 cm<sup>-1</sup> corresponds to -NH group. Elemental analysis: Calculated for C<sub>70</sub>H<sub>48</sub>N<sub>6</sub>: C 86.39; H 4.97; N 8.64; Found: C 86.38%; H 4.97%; N 8.63%.

**Table S1:** Comparison of this method in present manuscript over other reported procedure in literature for the preparation of  $\alpha$ -Fe<sub>2</sub>O<sub>3</sub> nanoparticles.

| S. No. | Publication                                                | Method of formation of $\alpha$ -Fe <sub>2</sub> O <sub>3</sub> nanoparticles  | Reagent Used                                                                                                                      | Reducing/Oxidising agent Used                    | Reaction time to prepare $\alpha$ -Fe <sub>2</sub> O <sub>3</sub> nanoparticles | Temp. (°C)        | Size              | Shape of $\alpha$ -Fe <sub>2</sub> O <sub>3</sub> nanoparticles | Recyclability by magnet after reaction |
|--------|------------------------------------------------------------|--------------------------------------------------------------------------------|-----------------------------------------------------------------------------------------------------------------------------------|--------------------------------------------------|---------------------------------------------------------------------------------|-------------------|-------------------|-----------------------------------------------------------------|----------------------------------------|
| 1      | Present manuscript                                         | Wet Chemical Method                                                            | Compound 3 in Water/EtOH and FeCl <sub>3</sub>                                                                                    | No                                               | 30 min                                                                          | Room Temperature  | 10-15 nm (length) | Nanorods                                                        | Yes                                    |
| 2      | <i>Chem. Commun.</i> , 2014, <b>50</b> , 8036              | Microwave followed by heating and reduction                                    | Graphite-Fe(CO) <sub>5</sub>                                                                                                      | Yes (5% H <sub>2</sub> /Ar)                      | 20 sec followed by 2 h heating                                                  | 600               | 0.4-0.6 $\mu$ m   | Submicron-wires 0.4-0.6 $\mu$ m (average: 0.49 $\mu$ m)         | Yes                                    |
| 3      | <i>J. Mater. Chem. A</i> , 2014, <b>2</b> , 10662          | Sequential pulsing of TBF in O <sub>2</sub> plasma and atomic layer deposition | Tertiary butyl ferrocene (TBF) and O <sub>2</sub> plasma in He and 5% H <sub>2</sub> /He                                          | Yes (O <sub>2</sub> plasma)                      | 50 min                                                                          | 150-350           | 16-45 nm          | film                                                            | No                                     |
| 4      | <i>Chem. Commun.</i> , 2014, <b>50</b> , 1215              | Hydrothermal method and nanocasting technique                                  | Fe(NO <sub>3</sub> ) <sub>3</sub> ·9H <sub>2</sub> O and Graphite (GNS)                                                           | No                                               | 24h/10h                                                                         | 40/200            | 2 nm              | Nanocrystals                                                    | No                                     |
| 5      | <i>Energy Environ. Sci.</i> , 2014, <b>7</b> , 451         | Bacterial iron biomineralization and annealing                                 | <i>Acidovorax</i> sp. Strain of BoFeN1/g-FeOOH under N <sub>2</sub> /H <sub>2</sub> (95/5) atmosphere (p(O <sub>2</sub> ) < 5 Pa) | Yes (Bacteria)                                   | 1 h                                                                             | 700               | 48±18 nm          | Hollow bacteriomorphs                                           | No                                     |
| 6      | <i>Chem. Mater.</i> , 2014, <b>26</b> , 2105               | Reduction and hydrothermal                                                     | TEOS, PLL, CTAB, Gd-DTPA, FeCl <sub>3</sub> , NaCl and KH <sub>2</sub> PO <sub>4</sub>                                            | Yes (KH <sub>2</sub> PO <sub>4</sub> )           | 72 h                                                                            | 100               | 420 ± 20 nm       | Spindle shaped                                                  | Yes                                    |
| 7      | <i>ACS Catal.</i> , 2014, <b>4</b> , 990                   | Ammonia-modified hydrothermal process and wet-chemical method                  | FeCl <sub>2</sub> , HCl, N <sub>2</sub> atm.                                                                                      | No                                               | 8 h                                                                             | 1100 (Inert atm.) | ~16 nm            | Spherical                                                       | No                                     |
| 8      | <i>ACS Appl. Mater. Interfaces</i> , 2014, <b>6</b> , 1113 | Hydrothermal                                                                   | FeCl <sub>3</sub> ·6H <sub>2</sub> O, Na <sub>2</sub> HPO <sub>4</sub> ·12H <sub>2</sub> O, Water, EtOH                           | Yes                                              | 14 h                                                                            | 105               | 240 nm            | Spindle                                                         | Yes                                    |
| 9      | <i>ACS Appl. Mater. Interfaces</i> , 2014, <b>6</b> , 7189 | Chemical vapor deposition                                                      | FeCl <sub>3</sub> , Water, EtOH, Nanomesh graphene (NMG)                                                                          | Yes (NH <sub>3</sub> ·H <sub>2</sub> O, 25 wt %) | 1 h                                                                             | 450               | 100 nm            | Spindle                                                         | No                                     |
| 10     | <i>Inorg. Chem.</i> , 2014, <b>53</b> , 2304               | Thermal Decomposition Approach                                                 | Iron acetate [Fe(ac) <sub>2</sub> ], trioctylphosphine oxide, hexadecylamine, 1-octadecene                                        | No                                               | 5 h                                                                             | 400               | 12-45 nm          | Mesoporous structure                                            | No                                     |
| 11     | <i>Cryst. Eng. Comm.</i> , 2014, <b>16</b> , 1451          | Hydrothermal growth                                                            | FeCl <sub>3</sub> , NaH <sub>2</sub> PO <sub>4</sub> . Solutions                                                                  | Yes                                              | 7 days                                                                          | 100               | ≤ 5 nm            | Spindles                                                        | No                                     |



|    |                                                             |                                                              |                                                                                                                                         |                                         |               |           |                           |                              |     |
|----|-------------------------------------------------------------|--------------------------------------------------------------|-----------------------------------------------------------------------------------------------------------------------------------------|-----------------------------------------|---------------|-----------|---------------------------|------------------------------|-----|
| 12 | <i>Cryst. Eng. Comm.</i> , 2014, <b>16</b> , 5566           | Hydrothermal process                                         | Iron(III) nitrate with zinc and cupric ions additives                                                                                   | Yes                                     | 16 h          | 160       | 300 nm                    | Quasi-thorhombic             | No  |
| 13 | <i>Cryst. Growth Des.</i> , 2014, <b>14</b> , 1039          | Solvothermal process                                         | Fe(NO <sub>3</sub> ) <sub>3</sub> ·9H <sub>2</sub> O, Sucrose solution, SBA-15                                                          | No                                      | 3 days        | 1100      | 40 nm                     | Nanorods                     | No  |
| 14 | <i>Cryst. Eng. Comm.</i> , 2014, <b>16</b> , 1553           | Solvothermal method by controlled hydrolysis                 | Fe(acac) <sub>3</sub> in ethanol and water                                                                                              | No                                      | 24 h          | 150       | 20 nm                     | Disc-like nanostructures     | No  |
| 15 | <i>Phys. Chem. Chem. Phys.</i> , 2014, <b>16</b> , 4284     | Electrodeposition (anodization method) followed by annealing | FeCl <sub>2</sub> solution (pH = 4.1, adjusted by 1 M HCl), EG, Water                                                                   | No                                      | 2 h           | 500       | 20-150 nm                 | Nanotubular                  | No  |
| 16 | <i>Chem. Commun.</i> , 2013, <b>49</b> , 8695               | Spray drying method followed by annealing                    | Fe(NO <sub>3</sub> ) <sub>3</sub> ·9H <sub>2</sub> O (10 mmol) and sucrose (10 mmol), N <sub>2</sub> atm.                               | No                                      | 5 h           | 400       | 30-3000 nm                | Multishelled hollow spheres  | No  |
| 17 | <i>Green Chem.</i> , 2013, <b>15</b> , 3077                 | Hydrolysis reaction, coprecipitation and dehydration         | FeCl <sub>2</sub> ·4H <sub>2</sub> O and [Fe(NO <sub>3</sub> ) <sub>3</sub> ·9H <sub>2</sub> O inert atmosphere                         | Yes                                     | 2 h           | 90        | 8-10 nm                   | Cubic                        | Yes |
| 18 | <i>Chem. Mater.</i> , 2013, <b>25</b> , 1549                | Molten salt syntheses (pyrolysis)                            | FeCl <sub>3</sub> ·6H <sub>2</sub> O, HCl, heat                                                                                         | No                                      | 24 h          | 100       | 425 ± 119                 | Hexagonal nanoplates         | No  |
| 19 | <i>J. Phys. Chem. C</i> , 2013, <b>117</b> , 11242          | Hydrothermal method                                          | FeCl <sub>3</sub> ·6H <sub>2</sub> O, EtOH, NH <sub>3</sub> solution, Autoclave                                                         | Yes (NH <sub>3</sub> )                  | 24 h          | 180       | 200-400 nm                | Nanoflowers                  | No  |
| 20 | <i>J. Mater. Chem. A</i> , 2013, <b>1</b> , 830             | Wet chemical and hydrothermal                                | FeCl <sub>3</sub> and MgCl <sub>2</sub> , NaOH                                                                                          | No                                      | 12 h          | 130       | 5-24 nm                   | Elongated rugby ball-like    | No  |
| 21 | <i>J. Mater. Chem. A</i> , 2013, <b>1</b> , 12400           | Microwave-assisted hydrothermal method                       | FeCl <sub>2</sub> ·4H <sub>2</sub> O sodium acetate distilled water                                                                     | No                                      | 10 min - 2 h  | r.t - 500 | 50 nm                     | Nanorods                     | No  |
| 22 | <i>Phys. Chem. Chem. Phys.</i> , 2013, <b>15</b> , 11717    | Electrodeposition and thermally annealed                     | FeSO <sub>4</sub> ·7H <sub>2</sub> O, 98.0% ascorbic acid (C <sub>6</sub> H <sub>8</sub> O <sub>6</sub> , amidosulfonic acid boric acid | No                                      | 6 h           | 500       | 250-900 nm                | Nanosheet                    | No  |
| 23 | <i>Cryst. Eng. Comm.</i> , 2013, <b>15</b> , 8166           | Hydrothermal method followed by annealing                    | (Fe(ClO <sub>4</sub> ) <sub>3</sub> ·xH <sub>2</sub> O, NaH <sub>2</sub> PO <sub>4</sub> , (NH <sub>2</sub> ) <sub>2</sub> CO, Water    | Yes (NaH <sub>2</sub> PO <sub>4</sub> ) | 12 h          | 120       | 3-5 nm                    | Spindles                     | No  |
| 24 | <i>ACS Appl. Mater. Interfaces</i> , 2013, <b>5</b> , 10246 | Chemical vapor deposition                                    | Ferrocene and sulphur, Argon, H <sub>2</sub>                                                                                            | Yes (H <sub>2</sub> )                   | 10-30 minutes | 1100-1150 | <20 nm                    | Rhombohedral                 | No  |
| 25 | <i>Cryst. Eng. Comm.</i> , 2012, <b>14</b> , 7701           | Biphasic interfacial reaction                                | Fe(acac) <sub>3</sub> , urea, PVP, K30, Benzene, Water                                                                                  | No                                      | 24 h          | 130       | 160–210 nm microstructure | Nanobundle based flower like | No  |

**Table S2:** Comparison of present probe **3** for Fe<sup>3+</sup> ions detection over other reported chemosensors of Fe<sup>3+</sup> ions reported in the literature:

| S. No | System                                                   | Utilization of fluorescent nanoaggregates for Fe <sup>3+</sup> ions detection | Ratiometric fluorescence response for Fe <sup>3+</sup> ions detection | Test strip for detection of trace amount of Fe <sup>3+</sup> ions | Detection Limit    |
|-------|----------------------------------------------------------|-------------------------------------------------------------------------------|-----------------------------------------------------------------------|-------------------------------------------------------------------|--------------------|
| 1     | <b>Present manuscript</b>                                | Yes                                                                           | Yes                                                                   | Yes                                                               | 64 nM              |
| 2     | <i>Chem. Commun.</i> , 2014, <b>50</b> , 8032            | No                                                                            | Yes                                                                   | Yes                                                               | -                  |
| 3     | <i>J. Mater. Chem. C</i> , 2014, <b>2</b> , 5576         | No                                                                            | No (Turn-On Fluorescence response)                                    | No                                                                | 126 nM             |
| 4     | <i>Chem. Commun.</i> , 2014, <b>50</b> , 4631            | No                                                                            | No (Turn-On Fluorescence response)                                    | No                                                                | 0.58 $\mu$ M       |
| 5     | <i>Inorg. Chem.</i> , 2014, <b>53</b> , 2144             | No                                                                            | No (Turn-On Fluorescence response)                                    | No                                                                | 4.8 $\mu$ M        |
| 6     | <i>Chem. Commun.</i> , 2013, <b>49</b> , 7797            | No                                                                            | Yes                                                                   | No                                                                | 1.2 $\mu$ M        |
| 7     | <i>Chem. Commun.</i> , 2013, <b>49</b> , 10739           | No                                                                            | No (Turn-On Fluorescence response)                                    | No                                                                | 10 <sup>-8</sup> M |
| 8     | <i>Chem. Commun.</i> , 2013, <b>49</b> , 11557           | No                                                                            | No                                                                    | No                                                                | 0.001 M            |
| 9     | <i>Anal. Chem.</i> 2013, <b>85</b> , 7441                | No                                                                            | No. only quenching is observed                                        | No                                                                | 0.9 $\mu$ M        |
| 10    | <i>ACS Appl. Mater. Interfaces</i> 2013, <b>5</b> , 1078 | No                                                                            | No. only quenching is observed                                        | Yes                                                               | 500 $\mu$ M        |

**Table S3:** Comparison of catalytic activity  $\alpha$ -Fe<sub>2</sub>O<sub>3</sub>/other iron oxide nanoparticles for the C-C Sonogashira coupling over other reported procedure in literature prepared by derivative **3**.

| S. No | Publication                                                              | Catalyst used (Nanoparticles)                                              | Use of Pd | Use of CuI | Use of Amine | Reaction time required | Temp. required (in °C) | Isolated Yield (Product, %) |
|-------|--------------------------------------------------------------------------|----------------------------------------------------------------------------|-----------|------------|--------------|------------------------|------------------------|-----------------------------|
| 1     | <b>Present manuscript</b>                                                | $\alpha$ -Fe <sub>2</sub> O <sub>3</sub>                                   | No        | No         | No           | 24 h                   | 80                     | 84                          |
| 2     | <i>Green Chem.</i> , 2013, <b>15</b> , 2132                              | Fe <sub>3</sub> O <sub>4</sub> @Si O <sub>2</sub> @PPh <sub>2</sub> @Pd(0) | Yes       | No         | No           | 3 h                    | 80                     | 90                          |
| 3     | <i>Adv. Synth. Catal.</i> , 2011, <b>353</b> , 125                       | Fe <sub>3</sub> O <sub>4</sub>                                             | No        | No         | No           | 35 h                   | 125                    | 92                          |
| 4     | <i>Angew. Chem. Int. Ed.</i> 2010, <b>49</b> , 1119                      | Fe <sub>3</sub> O <sub>4</sub> @Si O <sub>2</sub> @PPh <sub>2</sub> @Pd(0) | Yes       | No         | No           | 5 h                    | 60                     | 94                          |
| 5     | <i>Journal of Colloid and Interface Science</i> , 2010, <b>349</b> , 613 | Pd-Fe                                                                      | Yes       | Yes        | No           | 9 h                    | 80                     | 97                          |
| 6     | <i>ACS Nano</i> , 2009, <b>3</b> 728                                     | $\alpha$ -Fe <sub>2</sub> O <sub>3</sub> Nanopine-Pd                       | Yes       | No         | No           | 45 min                 | 110                    | 85                          |
| 7     | <i>Org. Lett.</i> , 2008, <b>10</b> , 3933                               | Pd/Fe <sub>3</sub> O <sub>4</sub>                                          | Yes       | No         | Yes          | 4 h                    | 130                    | 98                          |
| 8     | <i>Chem. Commun.</i> , 2005, 4435                                        | $\gamma$ -Fe <sub>2</sub> O <sub>3</sub> /NH C-Pd                          | Yes       | Yes        | No           | 12 h                   | 50                     | 90                          |

**Table S4:** Comparison of present method over other reported procedure in literature for photocatalytic degradation Rhodamine B (RhB) dye by  $\alpha$ -Fe<sub>2</sub>O<sub>3</sub> nanoparticles prepared by derivative **3**.

| S. No | Publication                                              | Degradation time required |
|-------|----------------------------------------------------------|---------------------------|
| 1     | <b>Present manuscript</b>                                | <b>26 min</b>             |
| 2     | <i>Nanoscale</i> , 2014, <b>6</b> , 6603                 | 80 min                    |
| 3     | <i>J. Mater. Chem. A</i> , 2013, <b>1</b> , 9837         | 720 min                   |
| 4     | <i>RSC Adv.</i> , 2013, <b>3</b> , 7912                  | 4 h                       |
| 5     | <i>Scientific Reports</i> , 2013, DOI: 10.1038/srep02204 | 100 min                   |
| 6     | <i>Angew. Chem. Int. Ed.</i> , 2012, <b>51</b> , 178     | 80-180 min                |
| 7     | <i>J. Mater. Chem.</i> , 2012, <b>22</b> , 9704          | 60 min                    |

**Table S5:** Comparison of catalytic activity  $\alpha$ -Fe<sub>2</sub>O<sub>3</sub> nanoparticles for the Sonogashira coupling reactions over other noble metal catalysts like Pd, Au, Ag, Ru etc. reported in the literature.

| Serial No. | Publication                                          | Catalyst used                                                                                       | Use of Noble metal | Use of CuI | Use of Amine | Solvent                         | Nano catalysis | Recycling | Reaction time | Temp. required (in °C) | Isolated Yield (Product, %) |
|------------|------------------------------------------------------|-----------------------------------------------------------------------------------------------------|--------------------|------------|--------------|---------------------------------|----------------|-----------|---------------|------------------------|-----------------------------|
| 1          | Present manuscript                                   | $\alpha$ -Fe <sub>2</sub> O <sub>3</sub> , K <sub>2</sub> CO <sub>3</sub>                           | No                 | No         | No           | Ethylene glycol (green solvent) | Yes            | Yes       | 24 h          | 80                     | 84                          |
| 2          | <i>Angew. Chem. Int. Ed.</i> 2013, <b>52</b> , 11554 | Pd(0) nanoparticle, KOAc                                                                            | Yes (Pd)           | No         | Yes          | NMP (toxic)                     | Yes            | No        | 24 h          | 160                    | 83                          |
| 3          | <i>Green Chem.</i> , 2013, <b>15</b> , 2349          | Pd catalyst, K <sub>2</sub> CO <sub>3</sub>                                                         | Yes (Pd)           | No         | No           | EtOH/Chlorobenzene (flammable)  | No             | Yes       | 18 h          | 60                     | 88                          |
| 4          | <i>Green Chem.</i> , 2013, <b>15</b> , 2132          | Fe <sub>3</sub> O <sub>4</sub> @-SiO <sub>2</sub> @PPh <sub>2</sub> @Pd(0), NaOH (Very complicated) | Yes (Pd)           | No         | No           | Water                           | No             | Yes       | 15 min-4 h    | 80                     | 91                          |
| 5          | <i>J. Mater. Chem. A</i> , 2014, <b>2</b> , 484      | Pd-PPh <sub>2</sub> -MCM-41@SiO <sub>2</sub> @Fe <sub>3</sub> O <sub>4</sub> (Very complicated)     | Yes (Pd)           | No         | No           | Water                           | No             | Yes       | 4 h           | 70                     | 95                          |
| 6          | <i>Chem. Eur. J.</i> 2013, <b>19</b> , 14024         | 5% Pd-Au/C, K <sub>3</sub> PO <sub>4</sub>                                                          | Yes (Pd, Au)       | No         | No           | <i>i</i> PrOH/H <sub>2</sub> O  | No             | No        | 20 h          | 80                     | 73                          |
| 7          | <i>Chem. Commun.</i> , 2010, <b>46</b> , 6524        | Pd@meso-SiO <sub>2</sub> (Very complicated)                                                         | Yes (Pd)           | No         | No           | EtOH                            | No             | Yes       | 30 h          | 80                     | 55                          |
| 8          | <i>Angew. Chem. Int. Ed.</i> 2007, <b>46</b> , 1536  | Au(I), K <sub>3</sub> PO <sub>4</sub>                                                               | Yes (Au)           | No         | No           | <i>O</i> -Xylene                | No             | No        | 24 h          | 130                    | 54                          |
| 9          | <i>Langmuir</i> , 2010, <b>14</b> , 12225            | Au-Ag-Pd trimetallic nanoparticles                                                                  | Yes (Pd, Au, Ag)   | No         | No           | DMF-H <sub>2</sub> O            | No             | No        | 2 h           | 120                    | 94                          |
| 10         | <i>Org. Lett.</i> , <b>2</b> , 2000, 2935            | Pd(PPh <sub>3</sub> ) <sub>2</sub> , Ag <sub>2</sub> O                                              | Yes (Pd, Ag)       | No         | No           | THF                             | No             | No        | 8 h           | 60                     | 60                          |
| 11         | <i>J. Comb. Chem.</i> 2004, <b>6</b> , 297           | RuCl <sub>2</sub> (1-Me,4- <i>i</i> PrC <sub>6</sub> H <sub>4</sub> )(PPh <sub>3</sub> )            | Yes (Ru)           | Yes        | Yes          | THF                             | No             | No        | 20 h          | 50                     | 10-100 (GC-Mass)            |

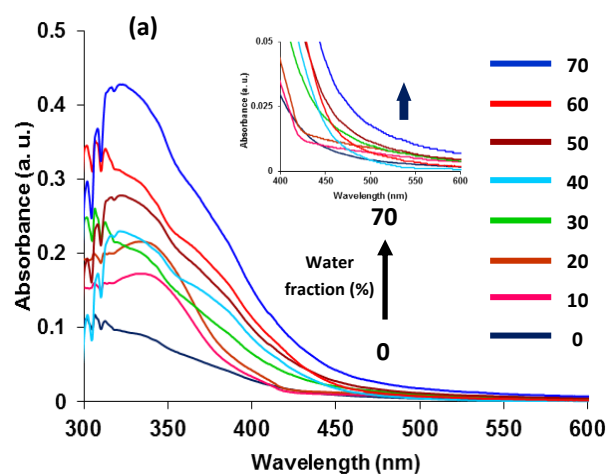

**Fig. S1A:** UV-vis spectrum showing the change in absorbance of compound **3** (5  $\mu\text{M}$ ) in Water/Ethanol mixture (0 to 70% volume fraction of water in Ethanol).

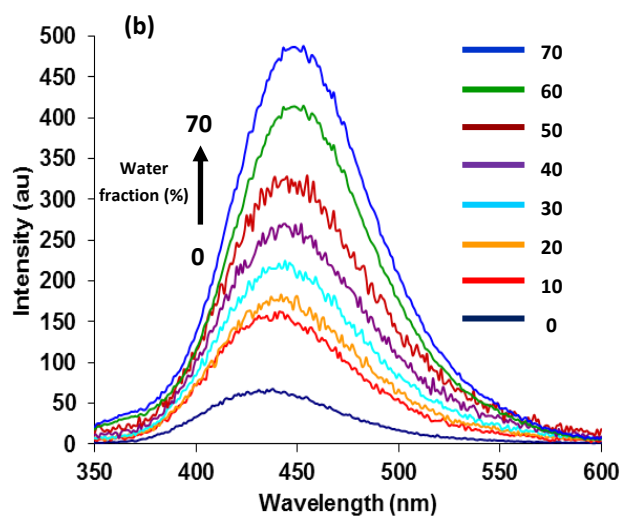

**Fig. S1B:** Fluorescence spectra of compound **3** (5  $\mu\text{M}$ ) showing the variation of fluorescence intensity in Water/Ethanol mixture (0 to 70% volume fraction of water in Ethanol);  $\lambda_{\text{ex}}$  = 320 nm.

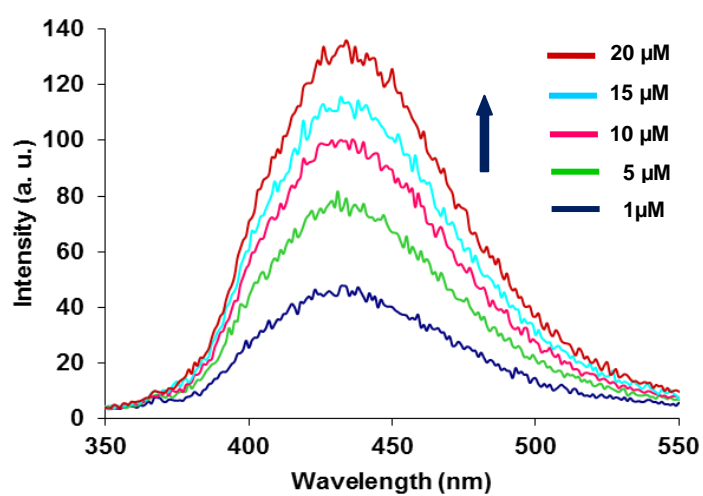

**Fig. S2:** Fluorescence spectra of compound **3** showing the variation of fluorescence intensity with different concentration of **3** (1 μM - 20 μM) in ethanol;  $\lambda_{\text{ex}}$  = 320 nm

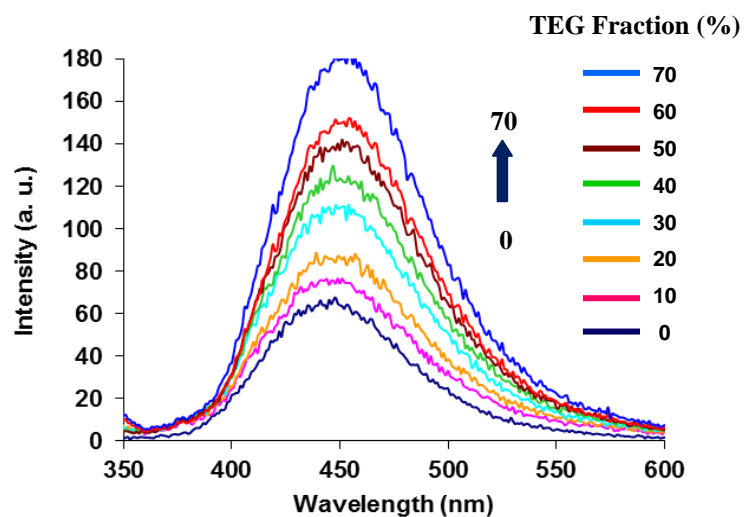

**Fig. S3A:** Fluorescence spectra of compound **3** (5  $\mu$ M) showing the variation of fluorescence intensity in TEG/EtOH mixture (0 to 70% volume fraction of TEG in Ethanol);  $\lambda_{\text{ex}}$ = 320 nm.

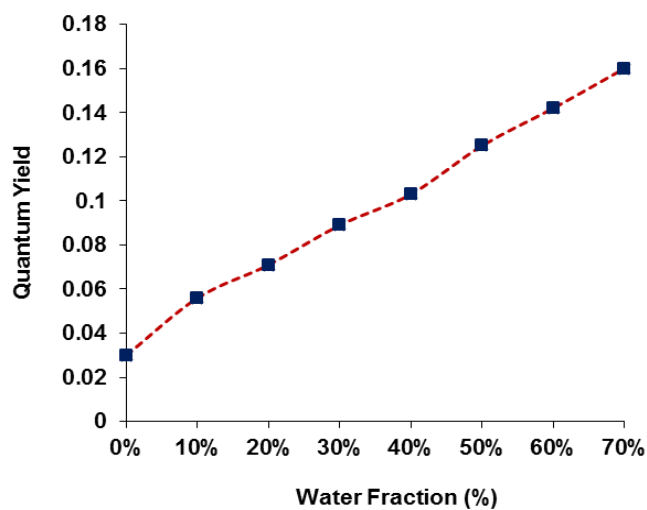

**Fig. S3B:** Variation in quantum yield value with the variation of water fractions (0 to 70% volume fraction of water in Ethanol);  $\lambda_{\text{ex}}$ = 320 nm.



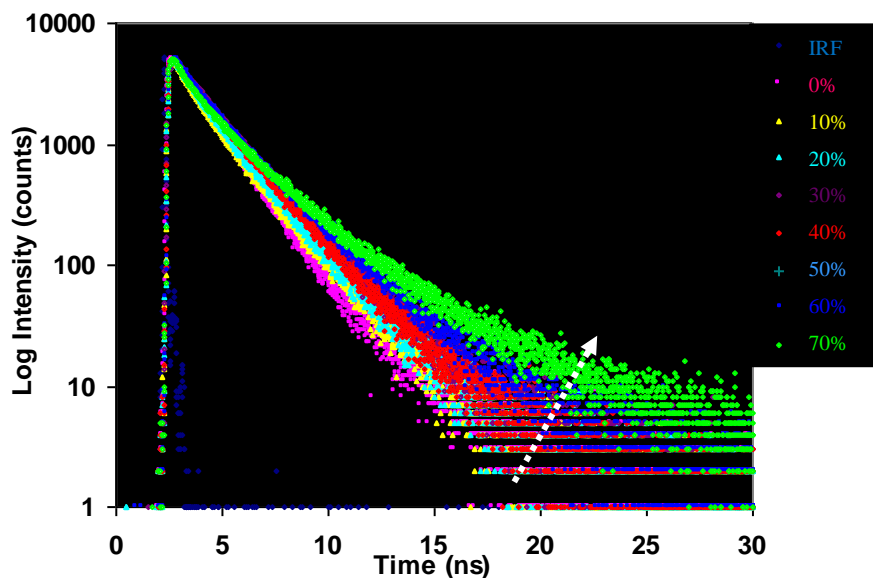

**Fig. S4:** Exponential fluorescence decays of **3** on addition of water fraction measured at 455 nm. Spectra were acquired in Water/Ethanol mixture (0 to 70% volume fraction of water in Ethanol),  $\lambda_{\text{ex}} = 377$  nm.

| Water fraction % | Quantum Yield ( $\Phi_f$ ) | $A_1/A_2$ | $\tau_1$ (ns) | $\tau_2$ (ns) | $\tau_{\text{avg}}$ (Average lifetime, ns) | $K_f$ ( $10^9 \text{ s}^{-1}$ ) | $K_{\text{nr}}$ ( $10^9 \text{ s}^{-1}$ ) |
|------------------|----------------------------|-----------|---------------|---------------|--------------------------------------------|---------------------------------|-------------------------------------------|
| 0                | 0.03                       | 65/35     | 0.08          | 1.33          | 0.2                                        | 0.15                            | 4.85                                      |
| 70               | 0.16                       | 10/90     | 0.57          | 1.67          | 1.41                                       | 0.113                           | 0.59                                      |

**Table S6:** Fluorescence lifetime of derivative **3** in absence and presence of water (70%) in EtOH at 455 nm.  $A_1$ ,  $A_2$ : fractional amount of molecules in each environment.  $\tau_1$ ,  $\tau_2$  and  $\tau_{\text{avg}}$ : bi-exponential and average life time of aggregates in 70 vol% of water in EtOH;  $K_f$ : radiative rate constant ( $K_f = \Phi_f/\tau_{\text{avg}}$ );  $K_{\text{nr}}$ : non-radiative rate constant ( $K_{\text{nr}} = (1 - \Phi_f)/\tau_{\text{avg}}$ );  $\lambda_{\text{ex}} = 377$  nm.

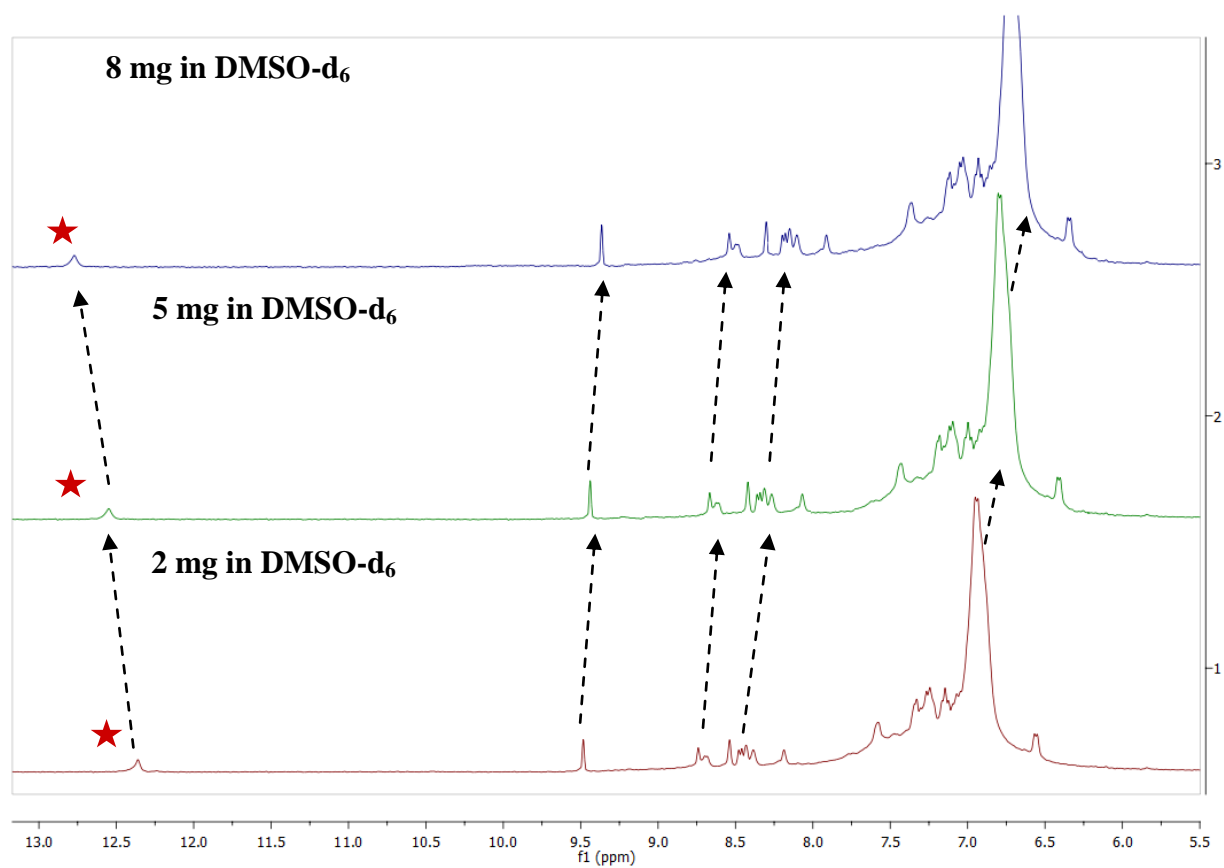

**Fig. S6:** Concentration dependent  $^1\text{H}$  NMR spectra of compound **3** in 500 $\mu\text{l}$   $\text{DMSO-d}_6$ .

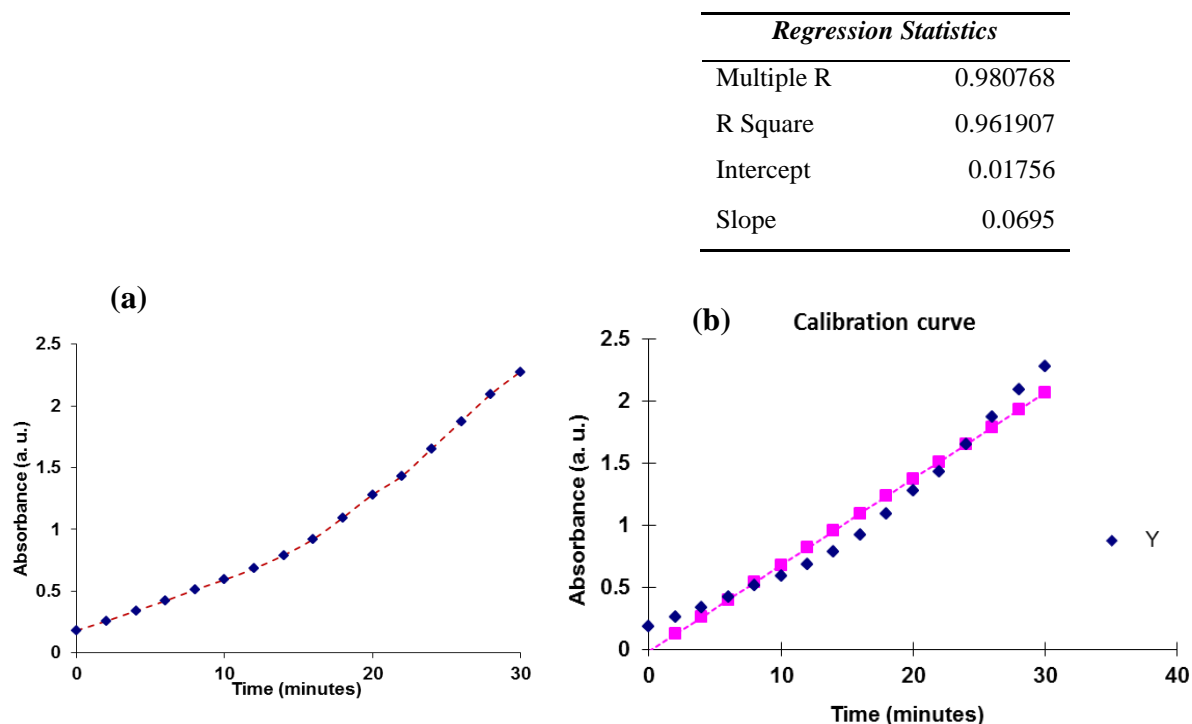

**Fig. S7:** Graphical representation of the rate of formation of  $\alpha$ -Fe<sub>2</sub>O<sub>3</sub> nanoparticles of derivative **3**. (a) Time (min.) vs. absorbance plot at 395 nm (b) regression plot of a.

The first order rate constant for the formation of iron oxide nanoparticles was calculated from the changes of intensity of absorbance of aggregates of derivative **3** in the presence of Fe<sup>3+</sup> ions at different time interval.

From the time vs. absorbance plot at fixed wavelength 395 nm by using first order rate equation we get the rate constant =  $k = \text{slope} \times 2.303 = 0.0695 \times 2.303 = 2.66 \times 10^{-3} \text{ Sec}^{-1}$ .

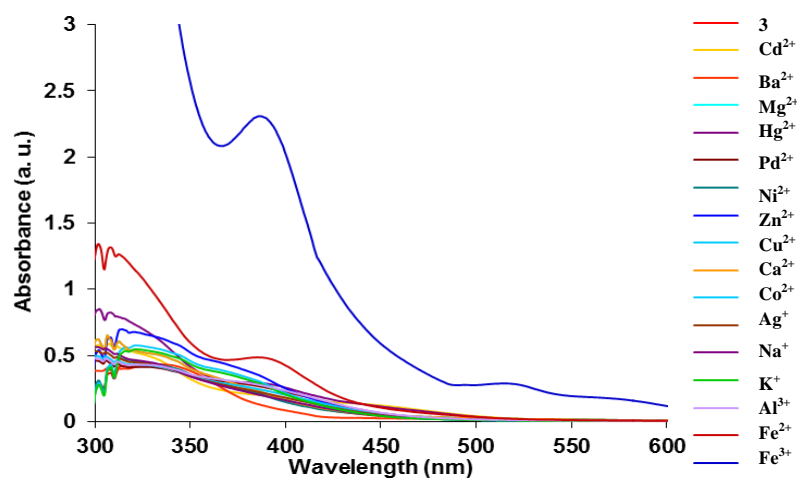

**Fig. S8A:** UV-vis spectra of derivative **3** (5  $\mu\text{M}$ ) upon additions of 50  $\mu\text{M}$  of various metal ions as their chloride salt in in  $\text{H}_2\text{O}/\text{EtOH}$  (7:3, v/v) mixture.

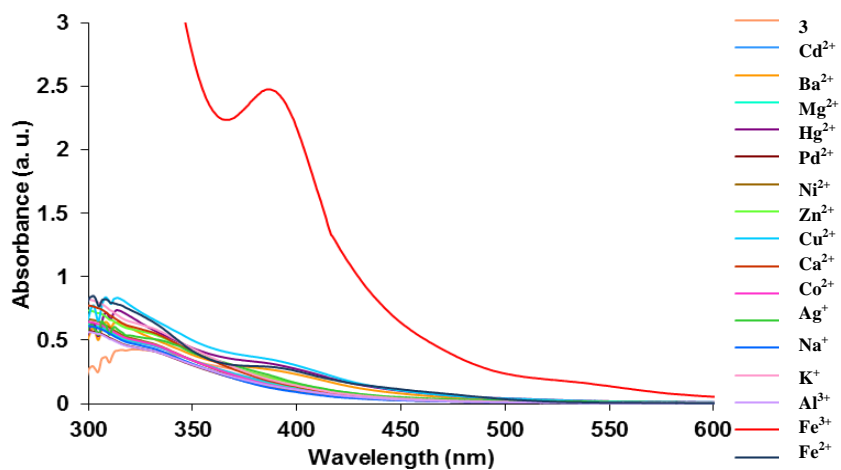

**Fig. S8B:** UV-vis spectra of derivative **3** (5  $\mu\text{M}$ ) upon additions of 50  $\mu\text{M}$  of various metal ions as their perchlorate salt in in  $\text{H}_2\text{O}/\text{EtOH}$  (7:3, v/v) mixture.

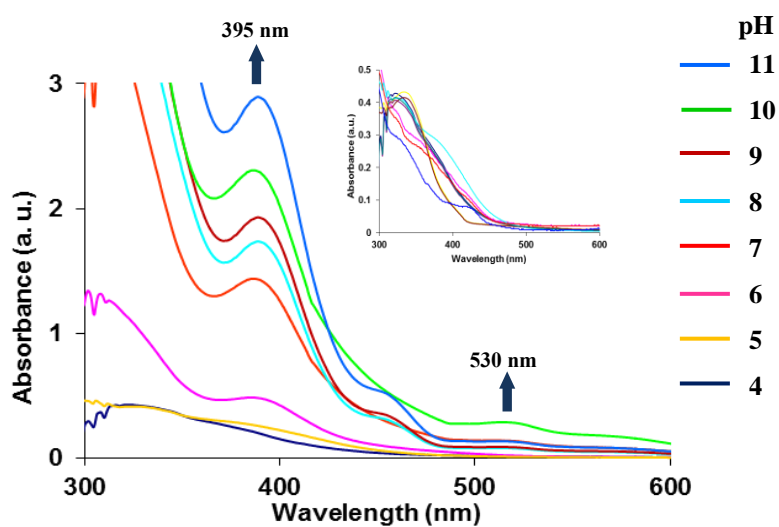

**Fig. S9:** UV-vis spectra of compound **3** (5  $\mu\text{M}$ ) showing the variation after 5 minutes of addition of  $\text{Fe}^{3+}$  ions (0-25 equiv.) in  $\text{H}_2\text{O}/\text{EtOH}$  (7:3, v/v) mixture at different pH solutions; Inset showing there is no variation in the absorbance of compound **3** (5  $\mu\text{M}$ ) with the variation of different pH solutions in  $\text{H}_2\text{O}/\text{EtOH}$  (7:3, v/v) mixture.

| <i>Regression Statistics</i> |                                                     |
|------------------------------|-----------------------------------------------------|
| Multiple R                   | 0.980854                                            |
| R Square                     | 0.962074                                            |
| <b>Stern-Volmer</b>          |                                                     |
| <b>constant =</b>            | <b><math>6.08 \times 10^4 \text{ M}^{-1}</math></b> |

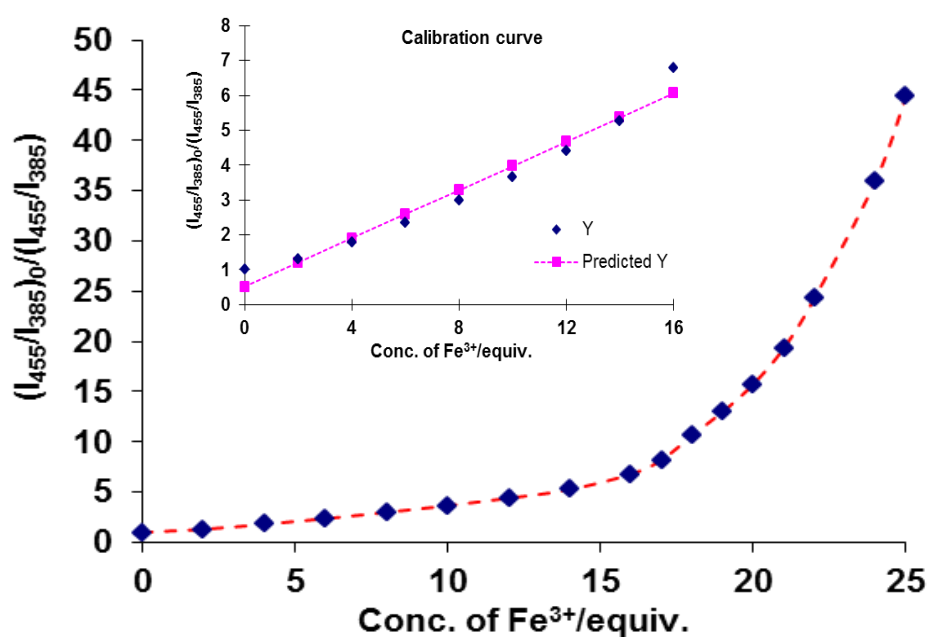

**Fig. S10:** Plot of fluorescence quenching efficiency of the ratiometric probe **3** (5  $\mu\text{M}$ ) as a function of the  $\text{Fe}^{3+}$  ions concentration.  $(I_{455}/I_{385})_0$  and  $(I_{455}/I_{385})$  were the ratio of the fluorescence intensity of the ratiometric probe in the absence and presence of different concentrations of  $\text{Fe}^{3+}$  ions, respectively; Inset showing the regression curve.

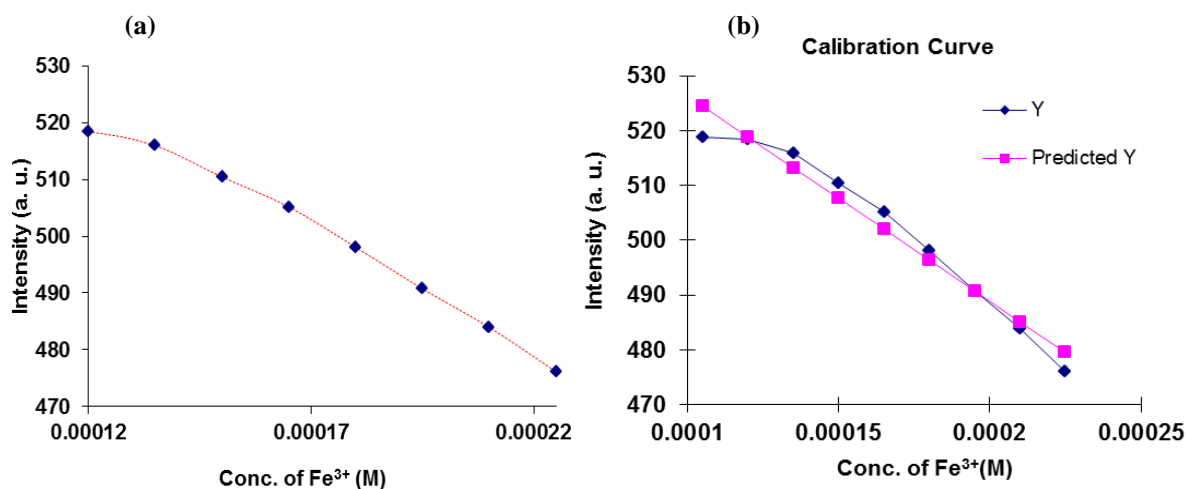

**Fig. S11:** (a) Showing the fluorescence intensity of compound **3** and (b) Calibrated curve showing the fluorescence intensity of compound **3** at 380 nm as a function of Fe<sup>3+</sup> ions concentration (equiv.) in H<sub>2</sub>O/EtOH (7:3, v/v) buffered with HEPES, pH = 7.05,  $\lambda_{\text{ex}}$  = 320 nm.

**Multiple R = 0.98135,**

**R<sup>2</sup> = 0.96305,**

**Standard deviation = 0.008,**

**Observation = 10,**

**Intercept = 563.80,**

**Slope = 374700**

The detection limit was calculated based on the fluorescence titration. To determine the S/N ratio, the emission intensity of receptor **3** without Fe<sup>3+</sup> was measured by 10 times and the standard deviation of blank measurements was determined. The detection limit is then calculated with the following equation:

$$DL = 3 \times SD/S$$

Where SD is the standard deviation of the blank solution measured by 10 times; S is the slope of the calibration curve.

**From the graph we get slope**

**S = 374700,** and SD value is 0.008

Thus using the formula we get the Detection Limit (DL) =  $3 \times 0.008/374700 = 64 \times 10^{-9} \text{ M}$

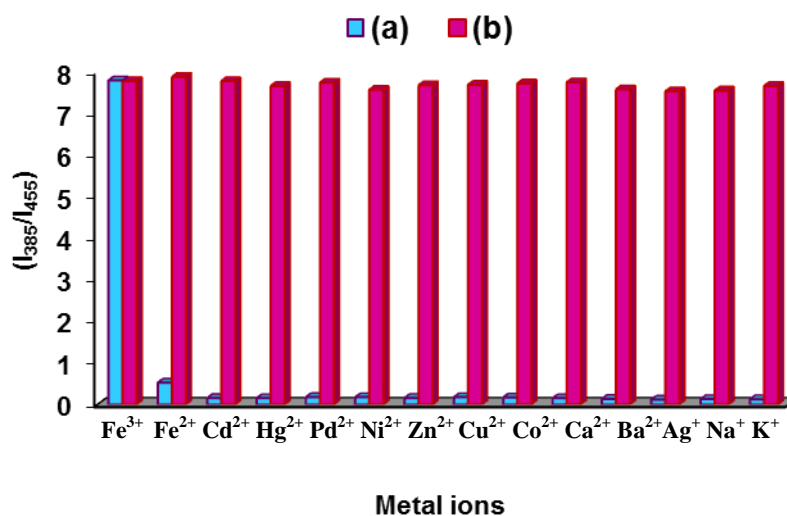

**Fig. S12A:** Fluorescence response of **3** (5.0 μM) to various metal ions of **chloride salts** (25 equiv) in H<sub>2</sub>O/EtOH (7:3, v/v) mixture buffered with HEPES; pH = 7.05; λ<sub>ex</sub> = 320 nm. Bars represent the emission intensity ratio (I<sub>385</sub>/I<sub>455</sub>) (I<sub>455</sub> = initial fluorescence intensity at 455 nm; I<sub>385</sub> = final fluorescence intensity at 385 nm after the addition of metal ions). (a) Blue bars represent selectivity (I<sub>385</sub>/I<sub>455</sub>) of **3** upon addition of different anions. (b) Pink bars represent competitive selectivity of receptor **3** toward Fe<sup>3+</sup> ions (25 equiv.) in the presence of other metal ions (100 equiv.).

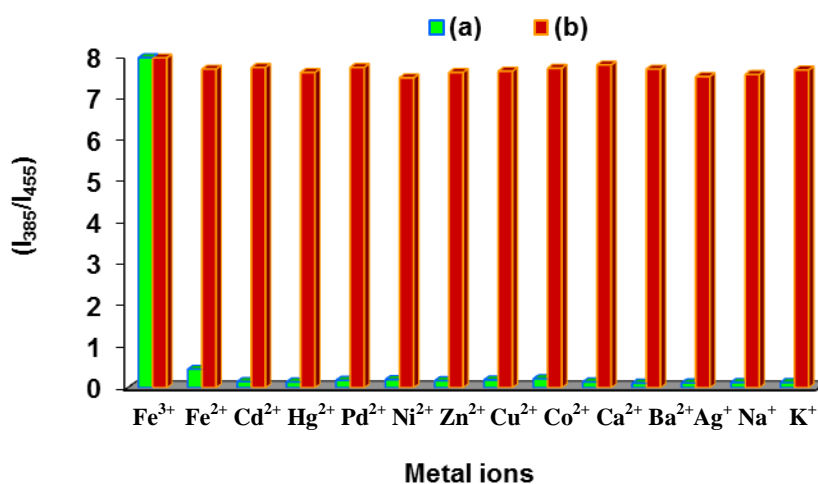

**Fig. S12B:** Fluorescence response of **3** (5.0 μM) to various metal ions of **perchlorate salts** (25 equiv) in H<sub>2</sub>O/EtOH (7:3, v/v) mixture buffered with HEPES; pH = 7.05; λ<sub>ex</sub> = 320 nm. Bars represent the emission intensity ratio (I<sub>385</sub>/I<sub>455</sub>) (I<sub>455</sub> = initial fluorescence intensity at 455 nm; I<sub>385</sub> = final fluorescence intensity at 385 nm after the addition of metal ions). (a) Green bars represent selectivity (I<sub>385</sub>/I<sub>455</sub>) of **3** upon addition of different anions. (b) Red bars represent competitive selectivity of receptor **3** toward Fe<sup>3+</sup> ions (25 equiv.) in the presence of other metal ions (100 equiv.).



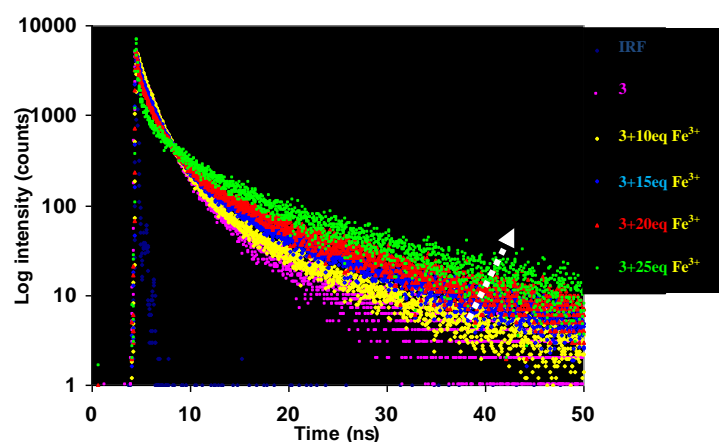

**Fig. S13:** Exponential fluorescence decays of **3** on addition of different amount of  $\text{Fe}^{3+}$  ions within 30 minutes measured at 385 nm. Spectra were acquired in  $\text{H}_2\text{O}/\text{EtOH}$  (7:3, v/v) mixture,  $\lambda_{\text{ex}} = 377$  nm.

| $\text{Fe}^{3+}$<br>(equiv.) | Quantum<br>Yield | $A_1/A_2$ | $\tau_1$<br>(ns) | $\tau_2$<br>(ns) | $\tau_{\text{avg}}$<br>(Average<br>lifetime, ns) | $K_f$<br>( $10^9 \text{ s}^{-1}$ ) | $K_{\text{nr}}$<br>( $10^9 \text{ s}^{-1}$ ) |
|------------------------------|------------------|-----------|------------------|------------------|--------------------------------------------------|------------------------------------|----------------------------------------------|
| 0                            | 0.16             | 95/5      | 0.27             | 1.55             | 0.55                                             | 0.29                               | 1.52                                         |
| 25                           | 0.14             | 45/55     | 0.57             | 1.78             | 1.35                                             | 0.104                              | 0.63                                         |

**Table S7:** Fluorescence lifetime of derivative **3** in absence and presence of  $\text{Fe}^{3+}$  ions (25 equiv.; 30 minutes) in  $\text{H}_2\text{O}/\text{EtOH}$  (7:3, v/v) mixture buffered with HEPES; pH = 7.05; at 385 nm.  $A_1$ ,  $A_2$ : fractional amount of molecules in each environment.  $\tau_1$  and  $\tau_2$ : biexponential life time of aggregates in 70 vol% of water in EtOH;  $K_f$ : radiative rate constant ( $K_f = \Phi_f/\tau_{\text{avg}}$ );  $K_{\text{nr}}$ : non-radiative rate constant ( $K_{\text{nr}} = (1 - \Phi_f)/\tau_{\text{avg}}$ );  $\lambda_{\text{ex}} = 377$  nm.

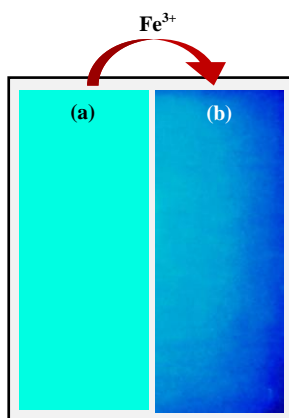

**Fig. S14A:** Photographs (under 365 nm UV light with naked eye) of compound **3** on test strips (a) before and (b) after dipping into aqueous solution of  $\text{Fe}^{3+}$  ions ( $10^{-3}$  M).

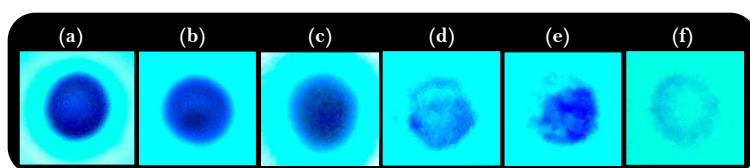

**Fig. S14B:** Paper strips of **3** showing the change in the fluorescence on addition of  $\text{Fe}^{3+}$  ions in aqueous medium at different concentrations of  $\text{Fe}^{3+}$  ions (a)  $10^{-1}$  M, (b)  $10^{-2}$  M, (c)  $10^{-3}$  M, (d)  $10^{-4}$  M, (e)  $10^{-5}$  M, (f)  $10^{-6}$  M (under 365 nm UV light).

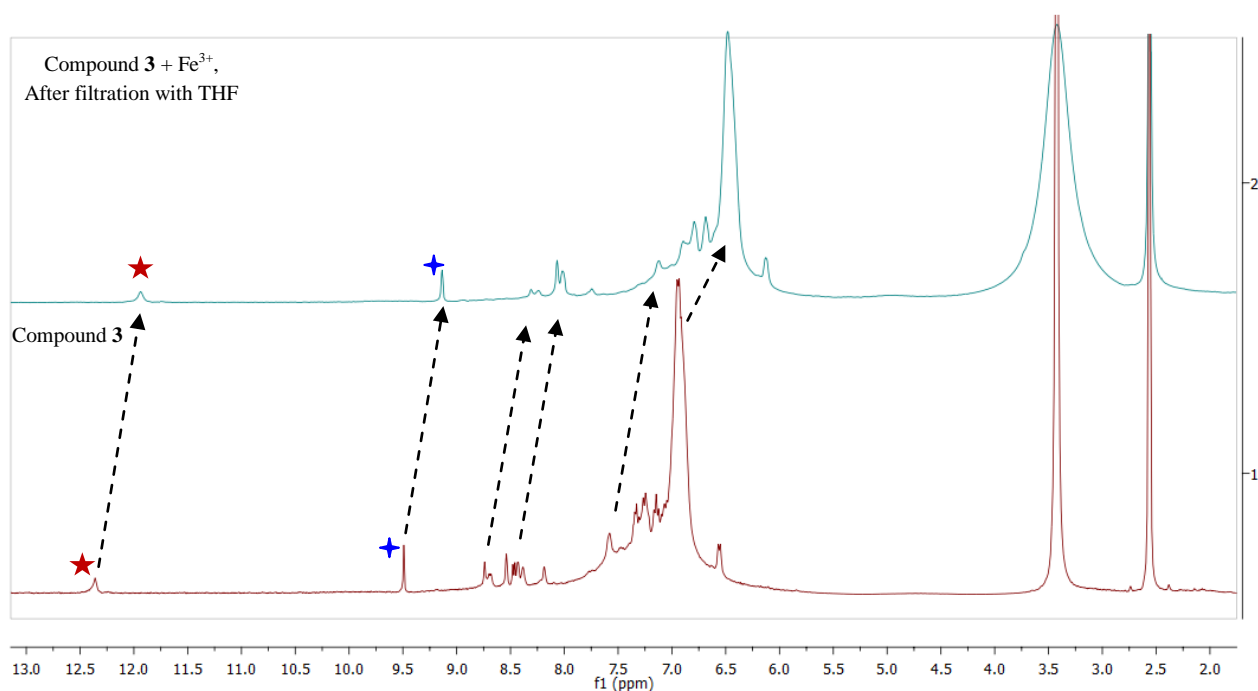

**Fig. S15:** Overlay  $^1\text{H}$  NMR spectra of derivative **3** in  $\text{DMSO-d}_6$  and  $\alpha\text{-Fe}_2\text{O}_3$  nanoparticles of derivative **3** after filtration with THF.

| Compound <b>3</b><br>( $\delta_3$ , ppm) | Compound <b>3</b> + $\text{Fe}^{3+}$ ,<br>After filtration by THF<br>( $\delta_F$ , ppm) | $\Delta\delta_1 = \delta_3 - \delta_F$ |
|------------------------------------------|------------------------------------------------------------------------------------------|----------------------------------------|
| ★ 12.36 (-NH)                            | 11.92                                                                                    | 0.44                                   |
| ★ 9.46 (-N=CH)                           | 9.15                                                                                     | 0.31                                   |
| 8.69 (d, aromatic)                       | 8.28                                                                                     | 0.41                                   |
| 8.48-8.38 (m, aromatic)                  | 8.10-8.06                                                                                | 0.38                                   |
| 8.19 (s, aromatic)                       | 7.72                                                                                     | 0.47                                   |
| 7.34 (d, aromatic)                       | 7.15                                                                                     | 0.19                                   |
| 7.26 (d, aromatic)                       | 6.82                                                                                     | 0.44                                   |
| 7.15 (t, aromatic)                       | 6.78                                                                                     | 0.37                                   |
| 7.06 (d, aromatic)                       | 6.65                                                                                     | 0.41                                   |
| 6.95-6.91 (m, aromatic)                  | 6.52-6.48                                                                                | 0.43                                   |
| 6.56 (d, aromatic)                       | 6.18                                                                                     | 0.38                                   |

**Table S8:** Change in chemical shift ( $\delta$ ) value of  $^1\text{H}$  NMR spectra of derivative **3** in  $\text{DMSO-d}_6$  and  $\alpha\text{-Fe}_2\text{O}_3$  nanoparticles of derivative **3** after filtration with THF.

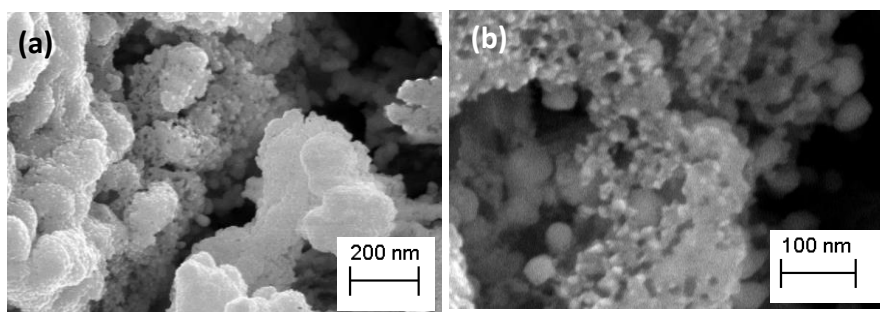

**Fig. S16A:** Photographs of SEM images (a-b) showing aggregates of **3** in H<sub>2</sub>O/EtOH (7:3, v/v) after treatment of FeCl<sub>3</sub> with compound **3**.

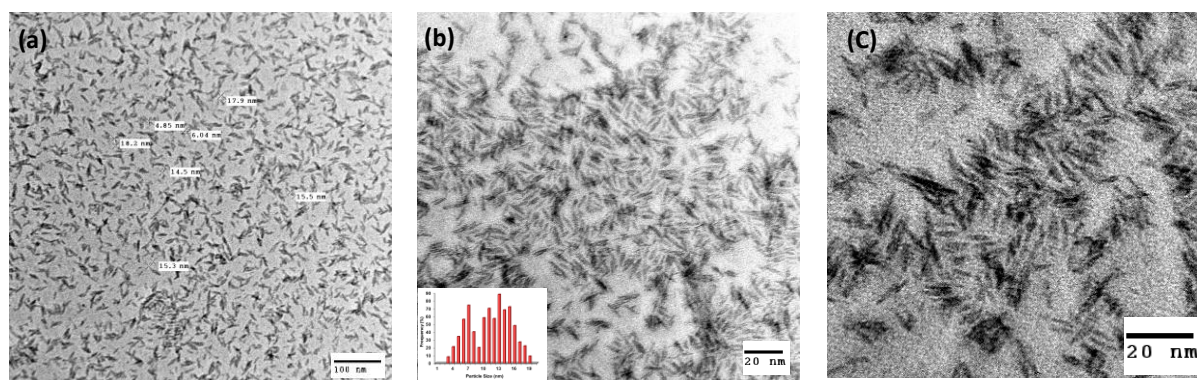

**Fig. S16B:** (a-c) The TEM images of  $\alpha$ -Fe<sub>2</sub>O<sub>3</sub> Nanorods and inset of b showing size distribution of these nanoparticles.

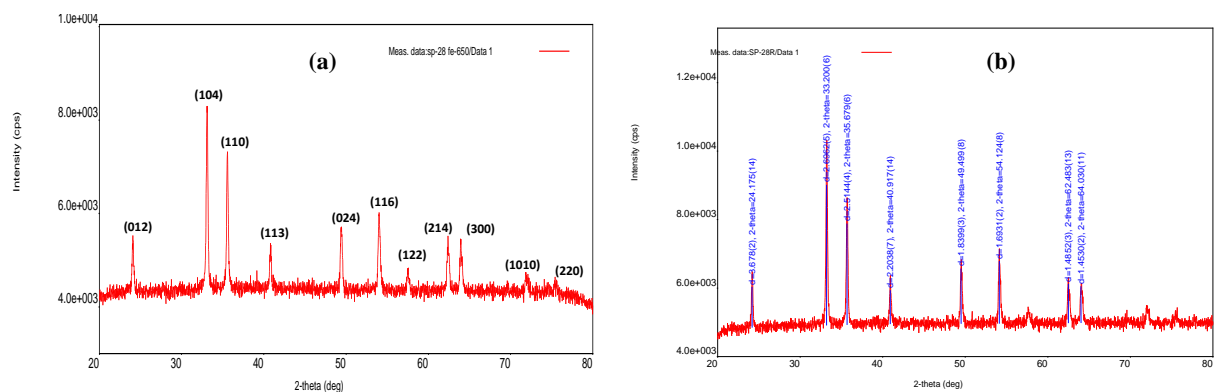

**Fig. S17A:** (a-b) Representative XRD diffraction patterns of  $\alpha$ -Fe<sub>2</sub>O<sub>3</sub> nanoparticles prepared by derivative 3.

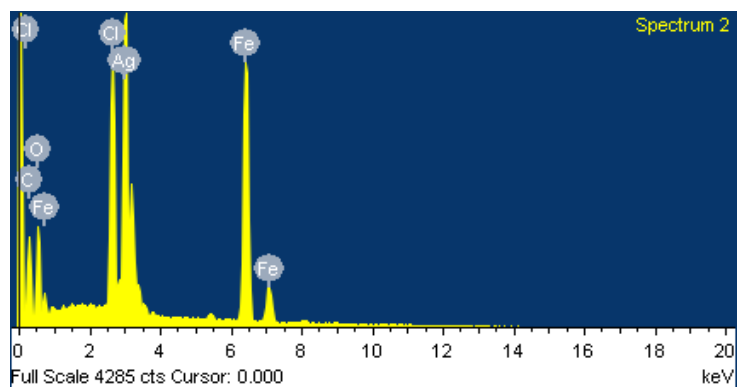

**Fig. S17B:** EDX spectra of  $\alpha$ -Fe<sub>2</sub>O<sub>3</sub>-nanoparticles of derivative 3

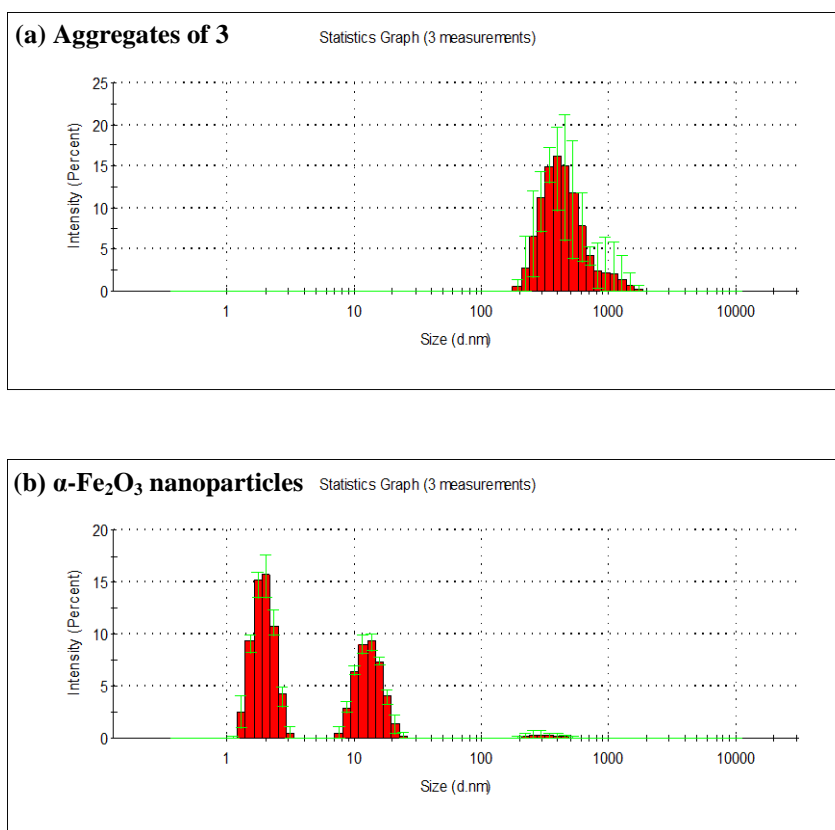

**Fig. S18:** Dynamic light scattering (DLS) results showing the particle size diameter (a) aggregates of **3** in H<sub>2</sub>O/EtOH (7:3, v/v) mixture and (b)  $\alpha$ -Fe<sub>2</sub>O<sub>3</sub> nanoparticles prepared by aggregates of **3**.

**Fig. S19: FT-IR Spectrum of  $\alpha$ -Fe<sub>2</sub>O<sub>3</sub> nanoparticles:**

*Agilent Resolutions Pro*

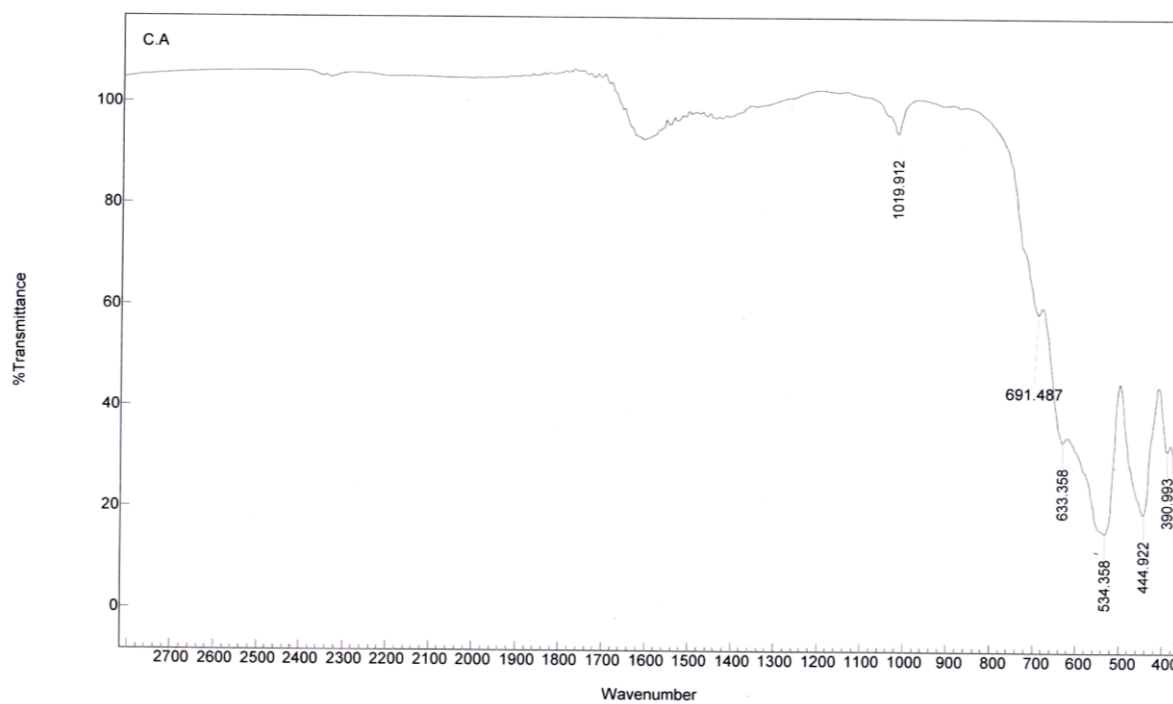

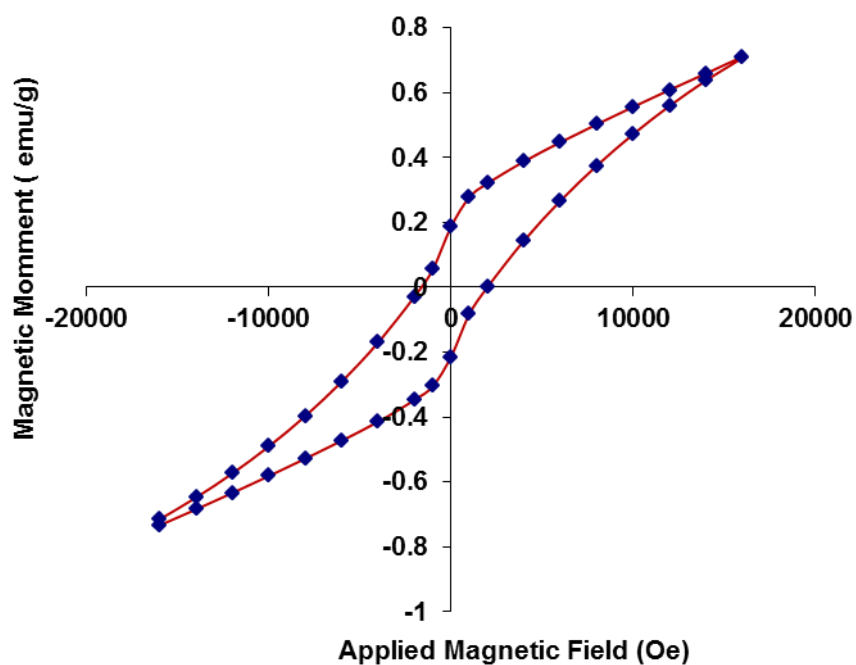

Parameters

|                 | Upward Part | Downward part | Average   | Parameter 'definition'                          |
|-----------------|-------------|---------------|-----------|-------------------------------------------------|
| Hysteresis Loop |             |               |           | Hysteresis Parameters                           |
| Hc Oe           | 1996.067    | -1661.297     | 1828.682  | Coercive Field: Field at which M/H changes sign |
| Mr emu          | -25.694E-3  | 22.339E-3     | 24.016E-3 | Remanent Magnetization: M at H=0                |
| S               | 0.302       | 0.254         | 0.278     | Squareness: Mr/Ms                               |
| S*              | 0.172       | 0.568         | 0.370     | 1-(Mr/Hc)/(1/slope at Hc)                       |
| Ms emu          | 84.990E-3   | -88.035E-3    | 86.513E-3 | Saturation Magnetization: maximum M measured    |
| M at H max emu  | 84.990E-3   | -85.789E-3    | 85.390E-3 | M at the maximum field                          |

**Fig. S20:** Hysteresis loops of  $\alpha$ -Fe<sub>2</sub>O<sub>3</sub> nanoparticles at room temperature, 25°C.



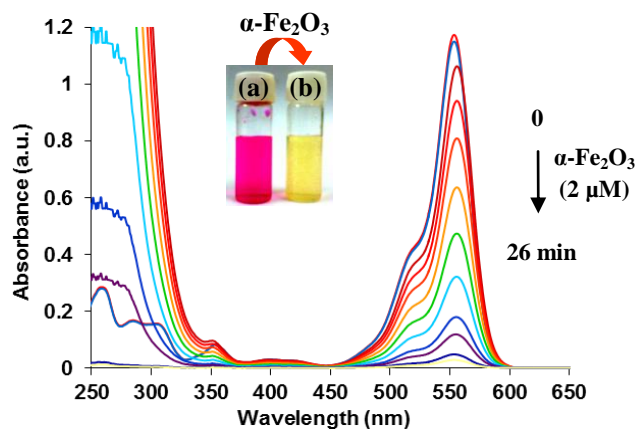

**Fig. S21A** Changes of time-dependent UV-Vis absorbance spectra of RhB solutions (0.1 mM) in the presence of  $\alpha\text{-Fe}_2\text{O}_3$  nanoparticle (2  $\mu\text{M}$ ) with 2 mM  $\text{H}_2\text{O}_2$  under visible-light irradiation for different time interval and (inset) photographs of the corresponding color change of RhB solutions from red to colourless (a) before and (b) after 26 minutes of  $\alpha\text{-Fe}_2\text{O}_3$  addition.

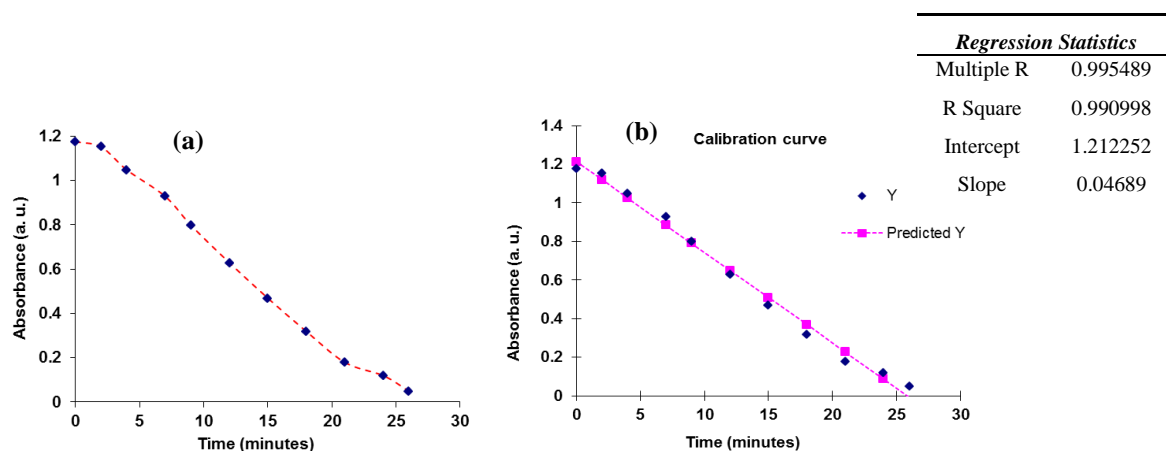

**Fig. S21B.** The rate of photo catalytic degradation of the aqueous solution RhB dye by  $\alpha\text{-Fe}_2\text{O}_3$  nanoparticles in presence of 2 mM  $\text{H}_2\text{O}_2$  (a) Time (min.) vs. absorbance plot at 555 nm (b) Calibration curve regression plot of A.

The first order rate constant of photo catalytic degradation of the aqueous solution RhB dye by iron oxide nanoparticles was calculated from the changes of intensity of absorbance of RhB dye by  $\alpha\text{-Fe}_2\text{O}_3$  nanoparticles at different time interval.

From the time vs. absorbance plot at fixed wavelength 555 nm by using first order rate equation we get the rate constant =  $k = \text{slope} \times 2.303 = 0.04689 \times 2.303 = 1.79 \times 10^{-3} \text{ Sec}^{-1}$

### Catalytic applications: Sonogashira Cross Coupling reactions

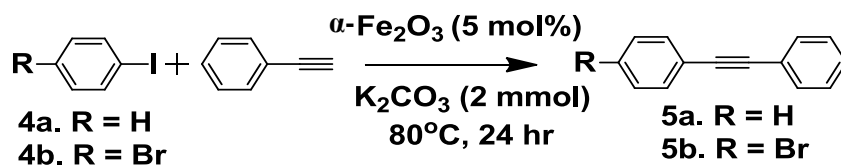

**Scheme 2.** Synthesis of hexaphenylbenzene based derivative **3**.

**Table S9:** The isolated yield of product formation in various solvent

| Entry     | Solvent | Isolated yield [%] |
|-----------|---------|--------------------|
| <b>5a</b> | EG      | <b>84</b>          |
|           | DMF     | <b>63</b>          |
| <b>5b</b> | EG      | <b>78</b>          |
|           | DMF     | <b>56</b>          |

#### Synthesis of Compound **5a**:

The reaction of iodobenzene (204 mg, 1 mmol) with phenylacetylene (100 mg, 1 mmol) as a model reaction in the presence of  $\text{K}_2\text{CO}_3$  (276 mg, 2 mmol) and 5 mol% of the Nano catalyst ( $\alpha\text{-Fe}_2\text{O}_3$ ) at  $80^\circ\text{C}$  was studied to furnished white crystalline **5a** in 84% (150 mg) yield (Scheme 2). The structure of compound **5a** was confirmed from its spectroscopic and analytical data (Fig. S22-S23, ESI<sup>†</sup>).  $^1\text{H}$  NMR (500 MHz,  $\text{CDCl}_3$ , ppm)  $\delta$  = 7.60-7.58 (m, 4H, ArH), 7.41-7.36 (m, 6H, ArH).  $^{13}\text{C}$  NMR (125 MHz,  $\text{CDCl}_3$ , ppm)  $\delta$  = 131.64, 128.38, 128.28, 123.31, 89.41. ESI-MS mass spectrum of compound **5a** showed a parent ion peak,  $m/z$  = 179.0805  $[\text{M}+\text{H}]^+$ .

#### Synthesis of Compound **5b**:

The reaction of 1-bromo-4-iodobenzene (282 mg, 1 mmol) with phenylacetylene (100 mg, 1 mmol) as a model reaction in the presence of  $\text{K}_2\text{CO}_3$  (276 mg, 2 mmol) and 5 mol% of the Nano catalyst ( $\alpha\text{-Fe}_2\text{O}_3$ ) at  $80^\circ\text{C}$  was studied to furnished white crystalline **5b** in 78% (200 mg) yield (Scheme 2). The structure of compound **5b** was confirmed from its spectroscopic and analytical data (Fig. S24-S25, ESI<sup>†</sup>).  $^1\text{H}$  NMR (500 MHz,  $\text{CDCl}_3$ , ppm)  $\delta$  = 7.57-7.55 (m, 2H, ArH), 7.51 (d,  $J$  = 10 Hz, 2H, ArH), 7.42 (d,  $J$  = 10 Hz, 2H, ArH), 7.39-7.38 (m, 3H, ArH).  $^{13}\text{C}$  NMR (125 MHz,  $\text{CDCl}_3$ , ppm)  $\delta$  = 133.04, 132.52, 131.63, 129.22, 128.42, 122.93, 122.27, 90.53, 88.32. ESI-MS mass spectrum of compound **5b** showed a parent ion peak,  $m/z$  = 257.0334  $[\text{M}+\text{H}]^+$ .

**Table S10a:** Comparison of catalytic activity  $\alpha$ -Fe<sub>2</sub>O<sub>3</sub> nanoparticles for the mentioned Sonogashira coupling (**5a**) over other reported procedure in literature.

| Compound                                                                                       | Serial No. | Publication                                          | Catalyst used                                                                                       | Use of Noble metal | Use of CuI | Use of Amine | Solvent                         | Nano catalysis | Recycling | Reaction time required | Temp. required (in °C) | Isolated Yield (Product, %) |
|------------------------------------------------------------------------------------------------|------------|------------------------------------------------------|-----------------------------------------------------------------------------------------------------|--------------------|------------|--------------|---------------------------------|----------------|-----------|------------------------|------------------------|-----------------------------|
| <br><b>5a</b> | 1          | Present manuscript                                   | $\alpha$ -Fe <sub>2</sub> O <sub>3</sub> , K <sub>2</sub> CO <sub>3</sub>                           | No                 | No         | No           | Ethylene glycol (Green Solvent) | Yes            | Yes       | 24 h                   | 80                     | 84                          |
|                                                                                                | 2          | <i>Angew. Chem. Int. Ed.</i> 2013, <b>52</b> , 11554 | Pd(0) nanoparticle, KOAc                                                                            | Yes (Pd)           | No         | Yes          | NMP (Toxic)                     | Yes            | No        | 24 h                   | 160                    | 83                          |
|                                                                                                | 3          | <i>Green Chem.</i> , 2013, <b>15</b> , 2349          | Pd catalyst, K <sub>2</sub> CO <sub>3</sub>                                                         | Yes (Pd)           | No         | No           | EtOH/Chlorobenzene (flammable)  | No             | Yes       | 18 h                   | 60                     | 88                          |
|                                                                                                | 4          | <i>Green Chem.</i> , 2013, <b>15</b> , 2132          | Fe <sub>3</sub> O <sub>4</sub> @-SiO <sub>2</sub> @PPh <sub>2</sub> @Pd(0), NaOH (Very complicated) | Yes (Pd)           | No         | No           | Water                           | No             | Yes       | 15 min-4 h             | 80                     | 91                          |
|                                                                                                | 5          | <i>J. Mater. Chem. A</i> , 2014, <b>2</b> , 484      | Pd-PPh <sub>2</sub> -MCM-41@SiO <sub>2</sub> @Fe <sub>3</sub> O <sub>4</sub> (Very complicated)     | Yes (Pd)           | No         | No           | Water                           | No             | Yes       | 4 h                    | 70                     | 95                          |
|                                                                                                | 6          | <i>Chem. Eur. J.</i> 2013, <b>19</b> , 14024         | 5% Pd-Au/C, K <sub>3</sub> PO <sub>4</sub>                                                          | Yes (Pd, Au)       | No         | No           | <i>i</i> PrOH/H <sub>2</sub> O  | No             | No        | 20 h                   | 80                     | 73                          |
|                                                                                                | 7          | <i>Tetrahedron Lett.</i> , 2014, <b>55</b> , 2256    | PVC-Pd(0), NMP                                                                                      | Yes (Pd)           | No         | Yes          | NMP                             | No             | Yes       | 3-4 h                  | r. t.                  | 93                          |
|                                                                                                | 8          | <i>Chem. Commun.</i> , 2010, <b>46</b> , 6524        | Pd@meso-SiO <sub>2</sub> (Very complicated)                                                         | Yes (Pd)           | No         | No           | EtOH                            | No             | Yes       | 30 h                   | 80                     | 55                          |
|                                                                                                | 9          | <i>Langmuir</i> , 2010, <b>14</b> , 12225            | Au-Ag-Pd trimetallic nanoparticles                                                                  | Yes (Pd, Au, Ag)   | No         | No           | DMF-H <sub>2</sub> O            | No             | No        | 2 h                    | 120                    | 94                          |

**Table S10b:** Comparison of catalytic activity  $\alpha$ -Fe<sub>2</sub>O<sub>3</sub> nanoparticles for the mentioned Sonogashira coupling (**5b**) over other reported procedure in literature.

| Compound                                                                                       | Serial No. | Publication                                         | Catalyst used                                                                    | Use of Noble metal | Use of CuI | Use of Amine | Solvent           | Nano catalysis | Recycling | Reaction time required | Temp. required (in °C) | Isolated Yield (Product, %) |
|------------------------------------------------------------------------------------------------|------------|-----------------------------------------------------|----------------------------------------------------------------------------------|--------------------|------------|--------------|-------------------|----------------|-----------|------------------------|------------------------|-----------------------------|
| 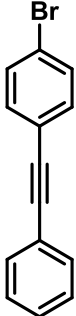<br><b>5b</b> | 1          | Present manuscript                                  | $\alpha$ -Fe <sub>2</sub> O <sub>3</sub> , K <sub>2</sub> CO <sub>3</sub>        | No                 | No         | No           | Ethylene glycol   | Yes            | Yes       | 24 h                   | 80                     | 78                          |
|                                                                                                | 2          | <i>J. Organomet. Chem.</i> , 2014, <b>749</b> , 405 | PS-triazine-Pd(II), Et <sub>3</sub> N                                            | Yes                | No         | Yes          | Et <sub>3</sub> N | No             | No        | 3 h                    | Room temp.             | 50                          |
|                                                                                                | 3          | <i>Adv. Synth. Catal.</i> , 2013, <b>18</b> , 3648  | Pd nanoparticle, <i>t</i> -BuOK                                                  | Yes                | No         | No           | Glycerol          | No             | No        | 2 h                    | 100                    | 91                          |
|                                                                                                | 4          | <i>J. Org. Chem.</i> , 2013, <b>78</b> , 12703      | Pd(OAc) <sub>2</sub> , PPh <sub>3</sub> , CuI, Et <sub>3</sub> N                 | Yes                | Yes        | Yes          | Et <sub>3</sub> N | No             | No        | 1 h                    | Room temp.             | 70                          |
|                                                                                                | 5          | <i>Adv. Synth. Catal.</i> , 2012, <b>8</b> , 1542   | Pd(PPh <sub>3</sub> ) <sub>2</sub> Cl <sub>2</sub> , CuI, Et <sub>3</sub> N, THF | Yes                | Yes        | Yes          | Et <sub>3</sub> N | No             | No        | 24 h                   | Room temp.             | 86                          |
|                                                                                                | 6          | <i>Adv. Funct. Mater.</i> , 2012, <b>10</b> , 2015  | Pd(PPh <sub>3</sub> ) <sub>2</sub> Cl <sub>2</sub> , CuI, Et <sub>3</sub> N      | Yes                | Yes        | Yes          | Et <sub>3</sub> N | No             | No        | 24 h                   | Room temp.             | 90                          |
|                                                                                                | 7          | <i>J. Am. Chem. Soc.</i> , 2011, <b>51</b> 20962    | Pd(PPh <sub>3</sub> ) <sub>2</sub> Cl <sub>2</sub> , CuI, Et <sub>3</sub> N, THF | Yes                | Yes        | Yes          | THF               | No             | No        | 24                     | Room temp.             | 28                          |
|                                                                                                | 8          | <i>Macromolecules</i> 1998, <b>31</b> , 6014        | Pd(PPh <sub>3</sub> ) <sub>4</sub> , CuI, Piperidine                             | Yes                | Yes        | Yes          | Piperidine        | No             | No        | 24 h                   | Room temp.             | 82                          |

**Fig. S22A:  $^1\text{H}$  NMR Spectra ( $\text{CDCl}_3$ , 500 MHz, ppm) of compound 5a:**

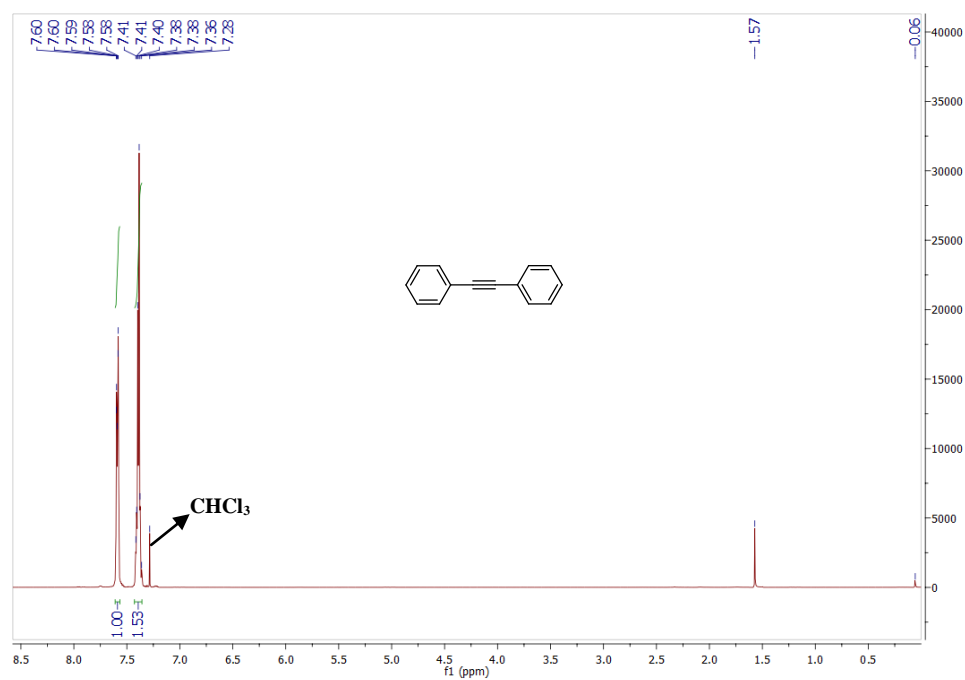

**Fig. S22B:  $^{13}\text{C}$  NMR Spectra ( $\text{CDCl}_3$ , 500 MHz, ppm) of compound 5a:**

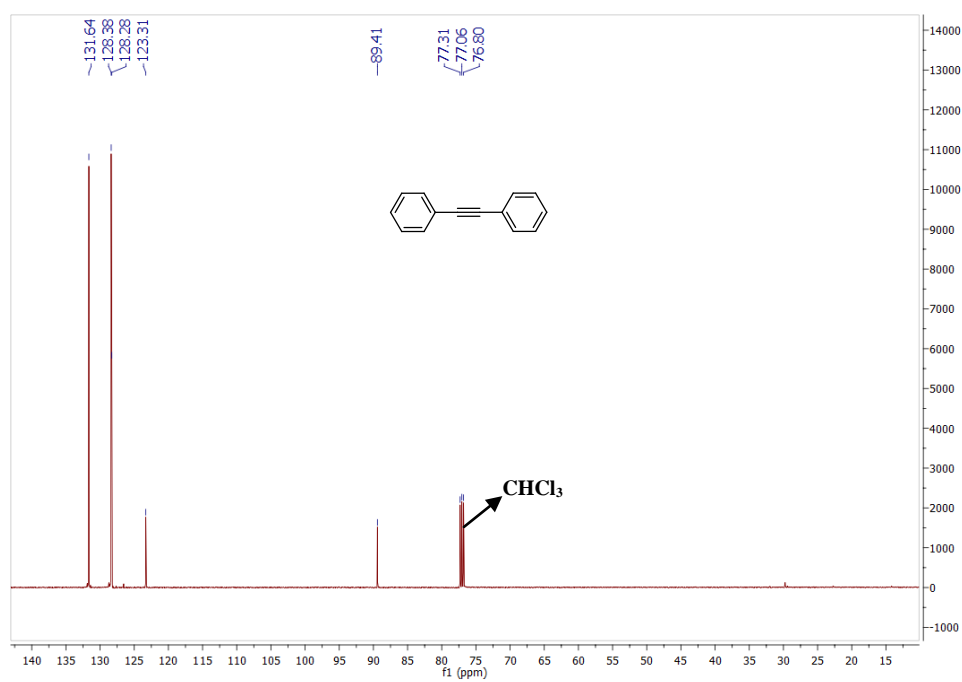

**Fig. S23: ESI-MS Spectrum of compound 5a:**

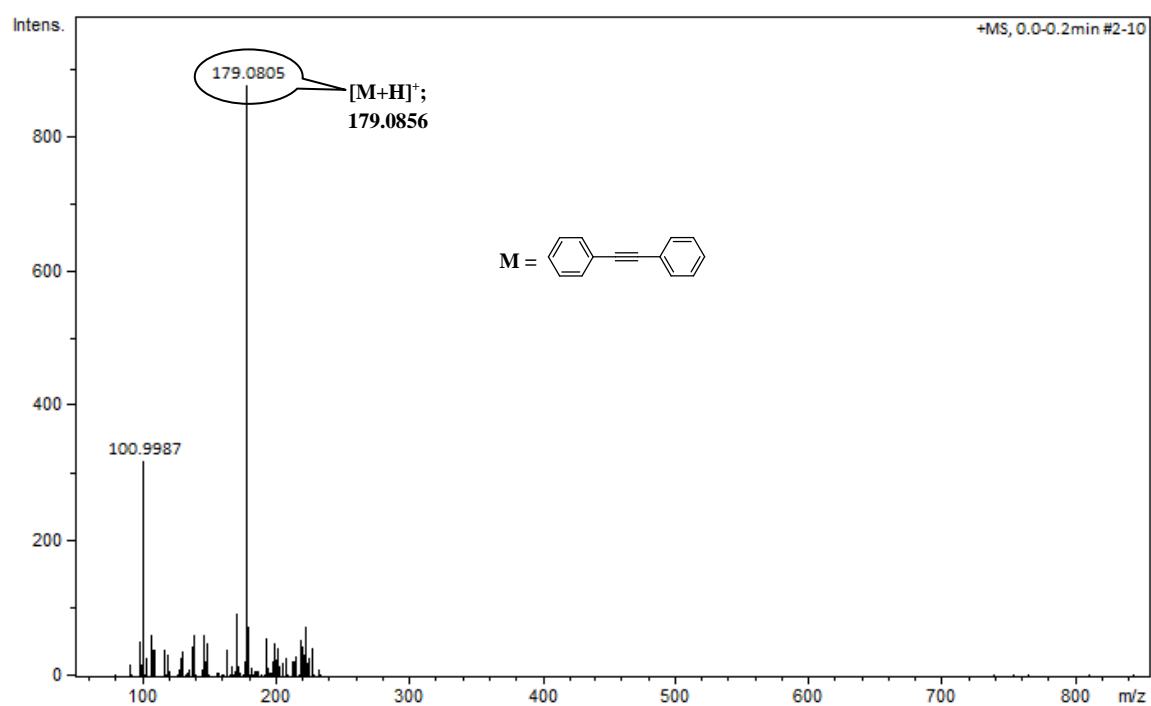

**Fig. S24A:  $^1\text{H}$  NMR Spectra ( $\text{CDCl}_3$ , 500 MHz, ppm) of compound 5b:**

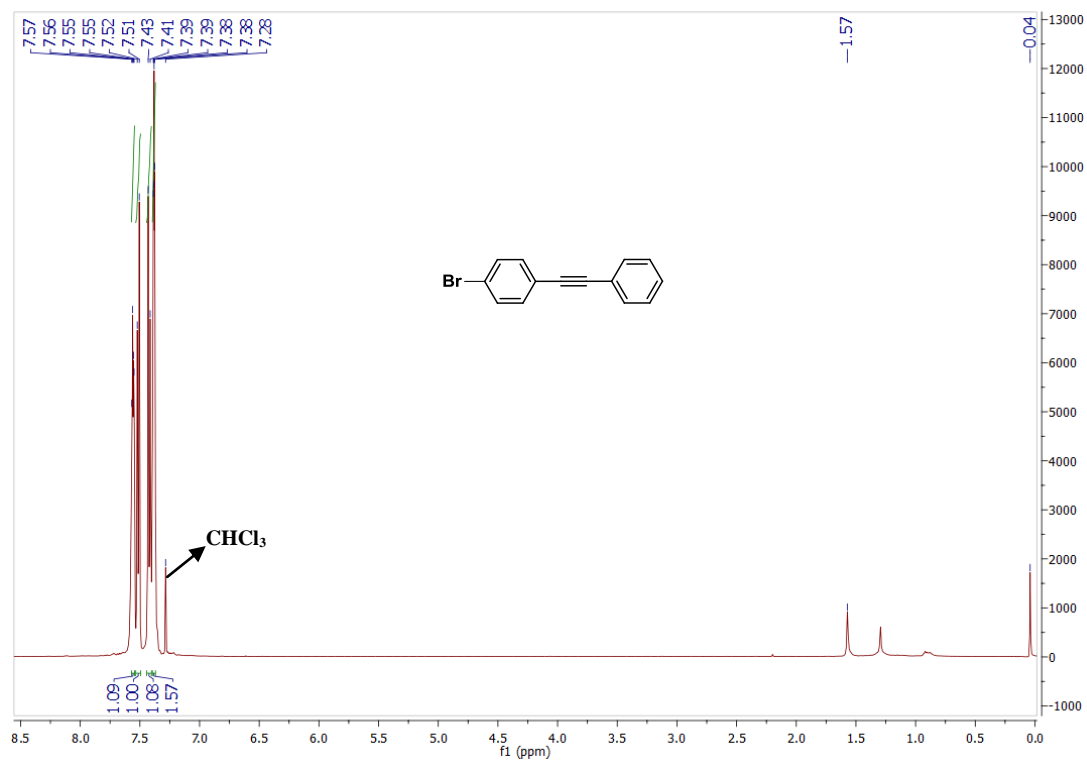

**Fig. S24B:  $^{13}\text{C}$  NMR Spectra ( $\text{CDCl}_3$ , 500 MHz, ppm) of compound 5b:**

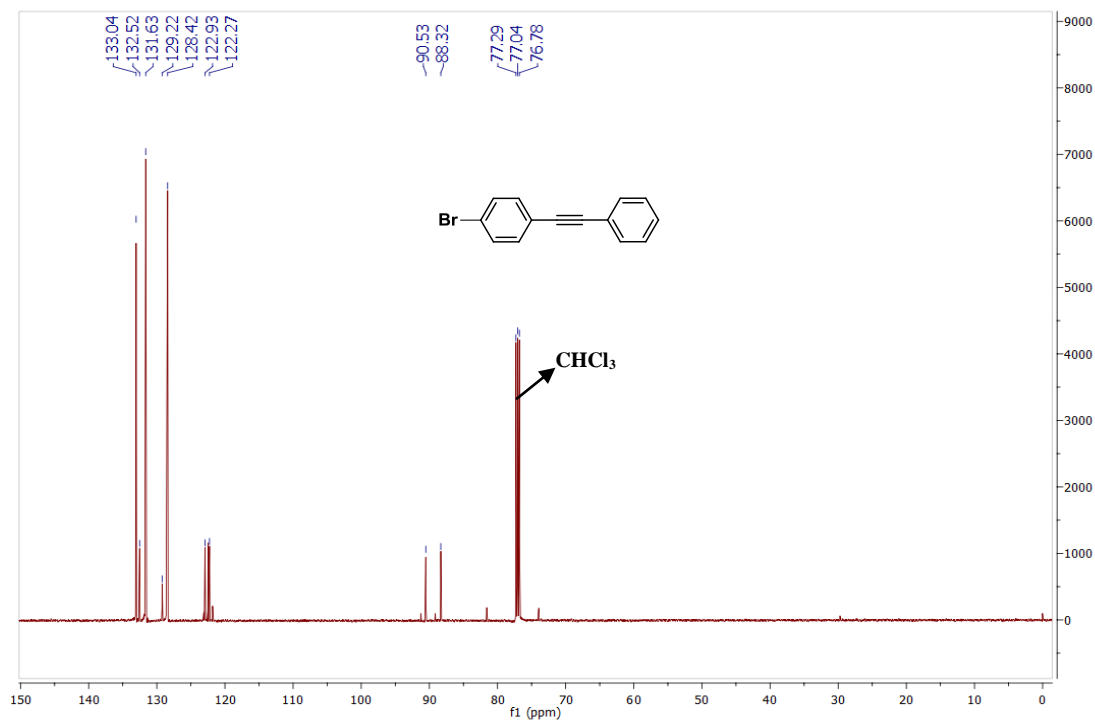

**Fig. S25: ESI-MS Spectrum of compound 5b:**

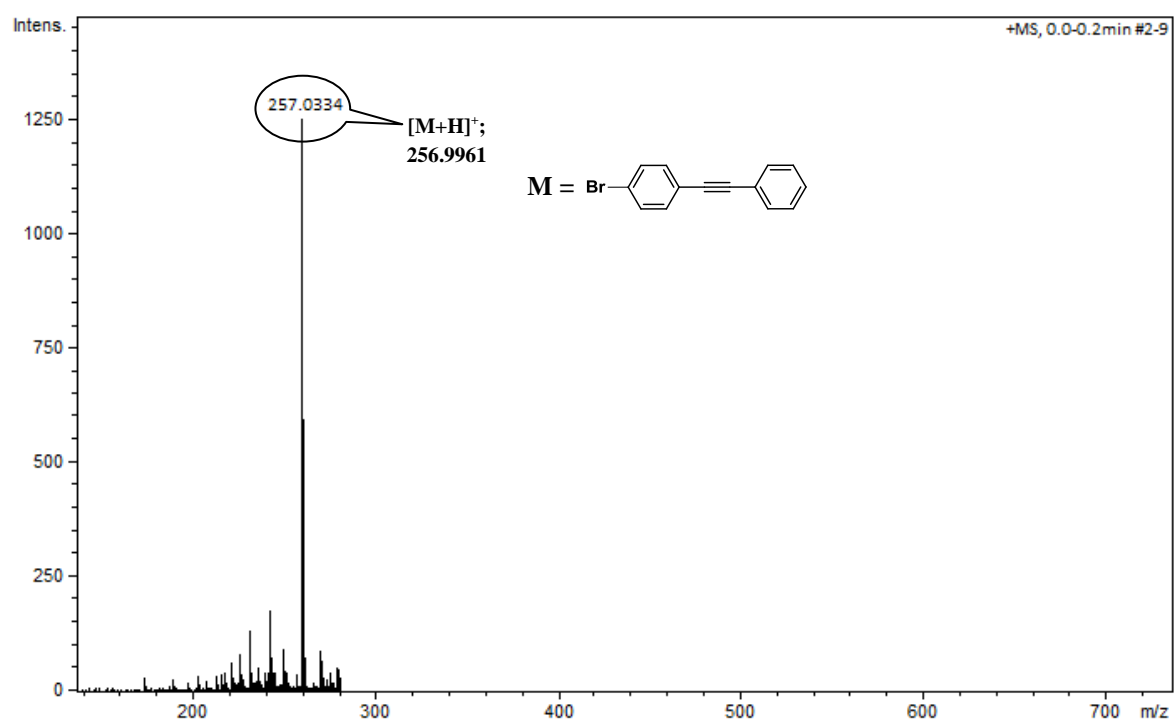



**Fig. S26A:  $^1\text{H}$  NMR Spectra (DMSO- $d_6$ , 400 MHz, ppm) of compound 3:**

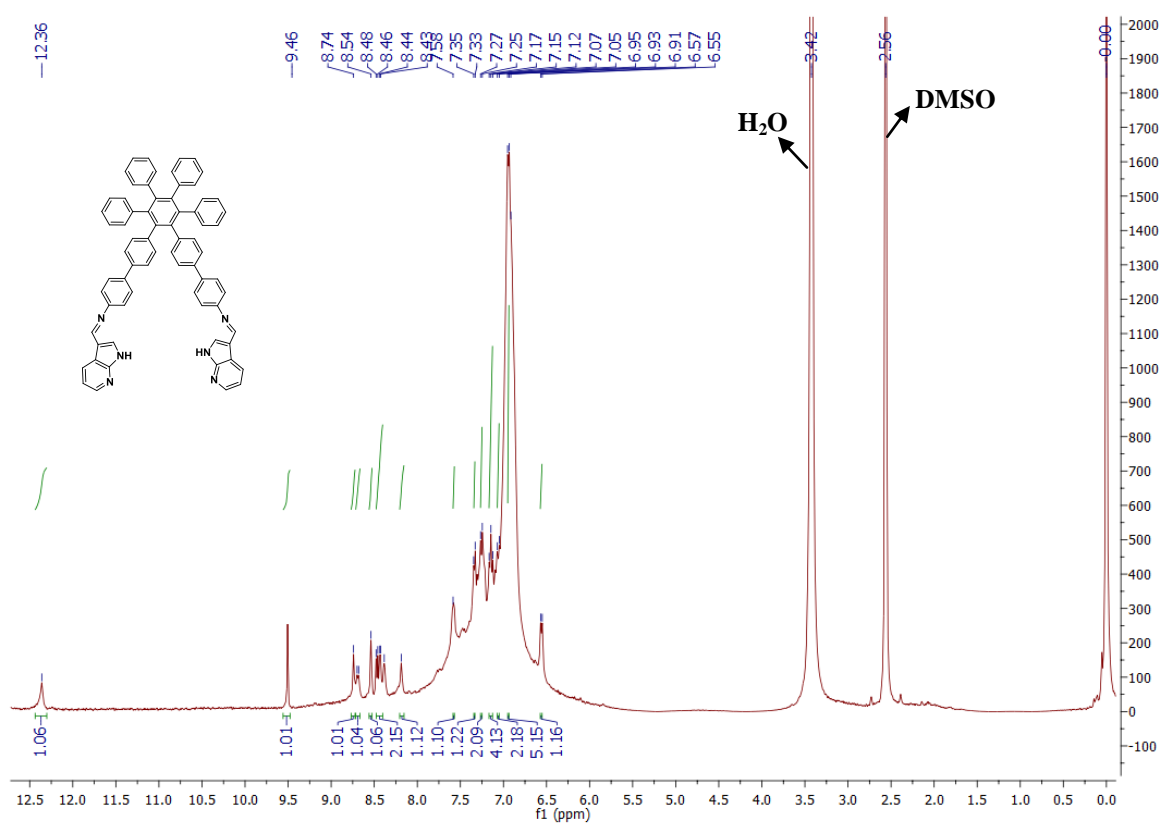

**Fig. S26B: Expanded  $^1\text{H}$  NMR Spectra (DMSO- $d_6$ , 400 MHz, ppm) of compound 3:**

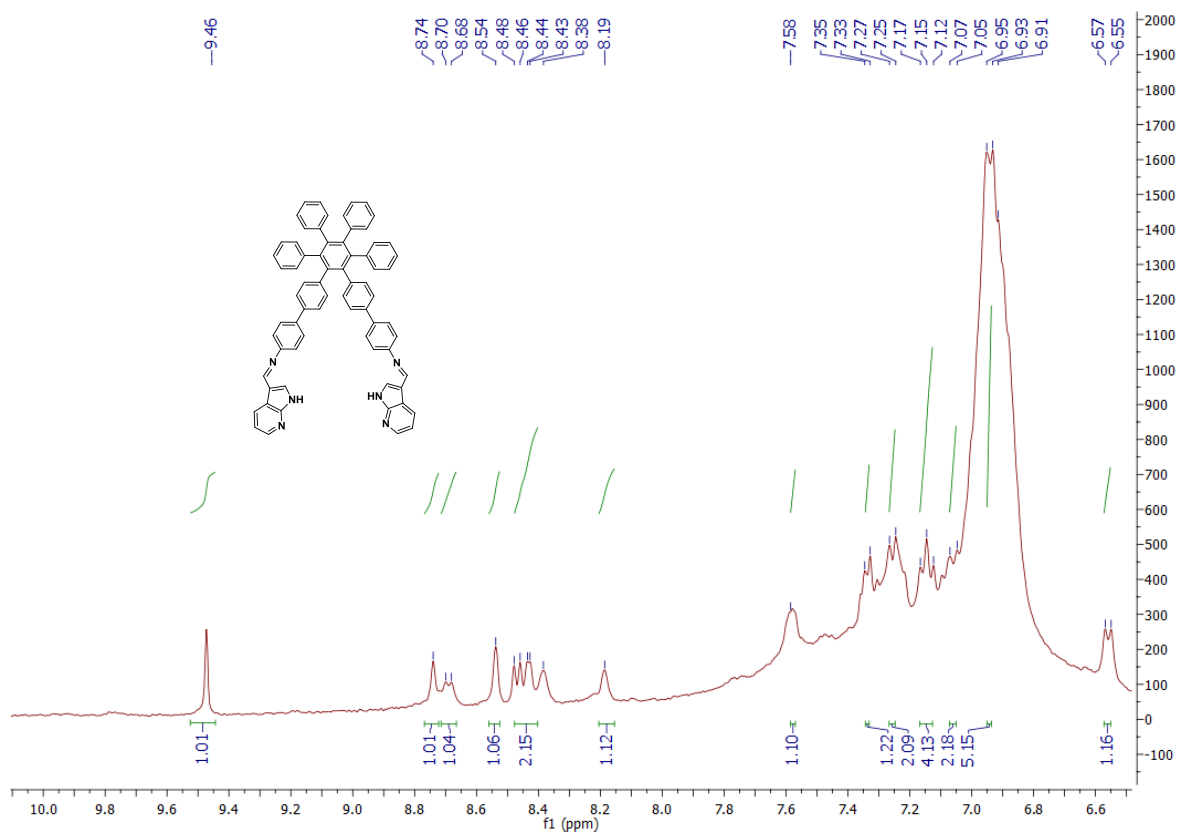

**Fig. S27:  $^{13}\text{C}$  NMR Spectra ( $\text{CDCl}_3$ , 400 MHz, ppm) of compound 3:**

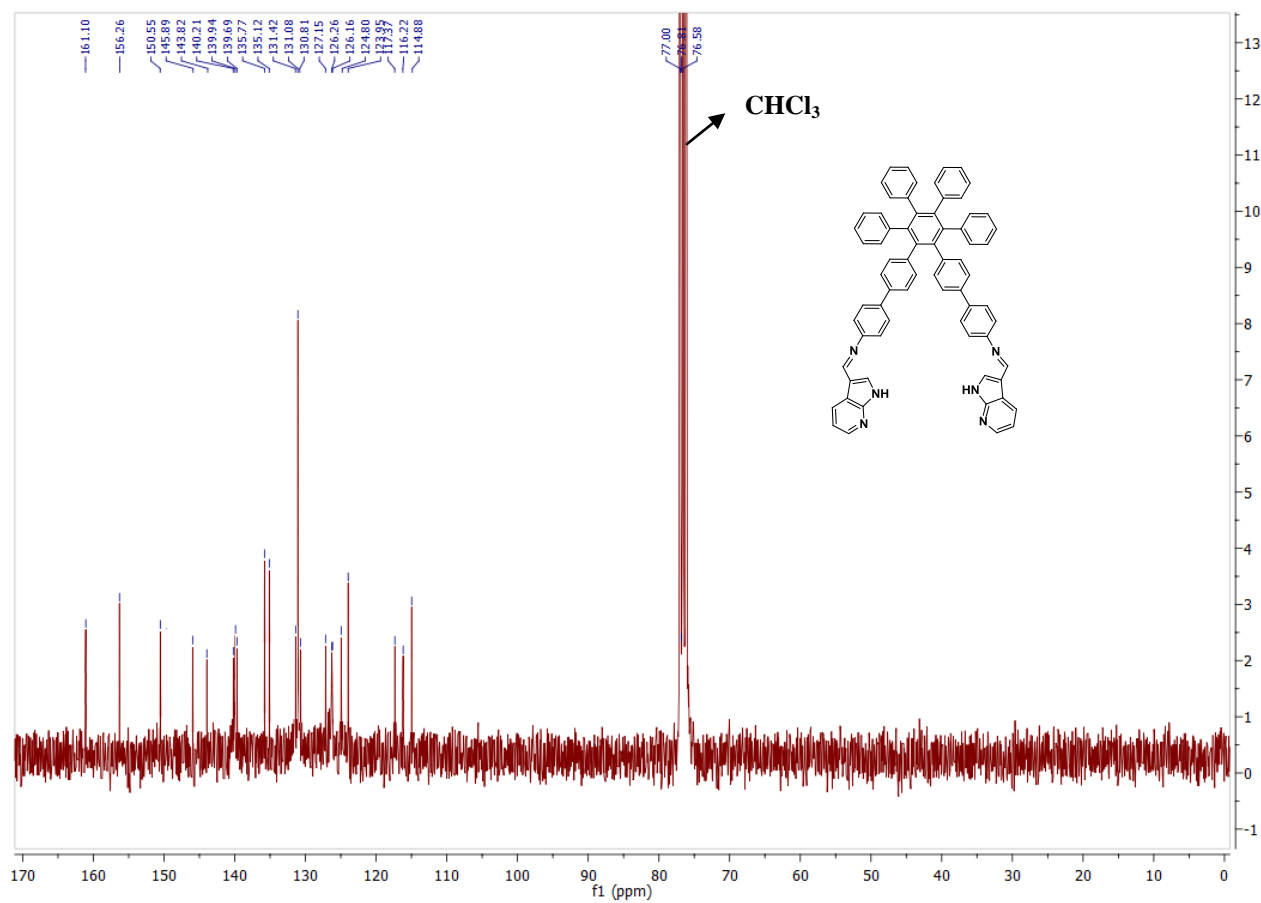

**Fig. S28: ESI-MS Spectrum of compound 3:**

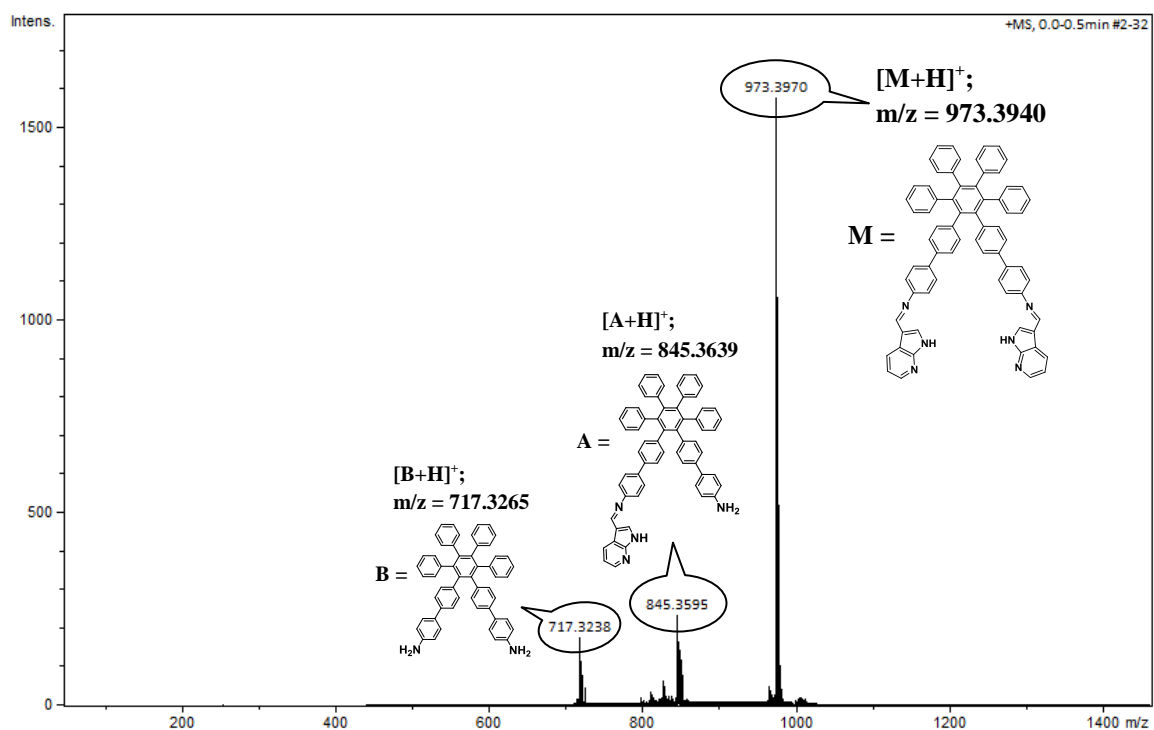

**Fig. S29: FT-IR Spectrum of compound 3:**

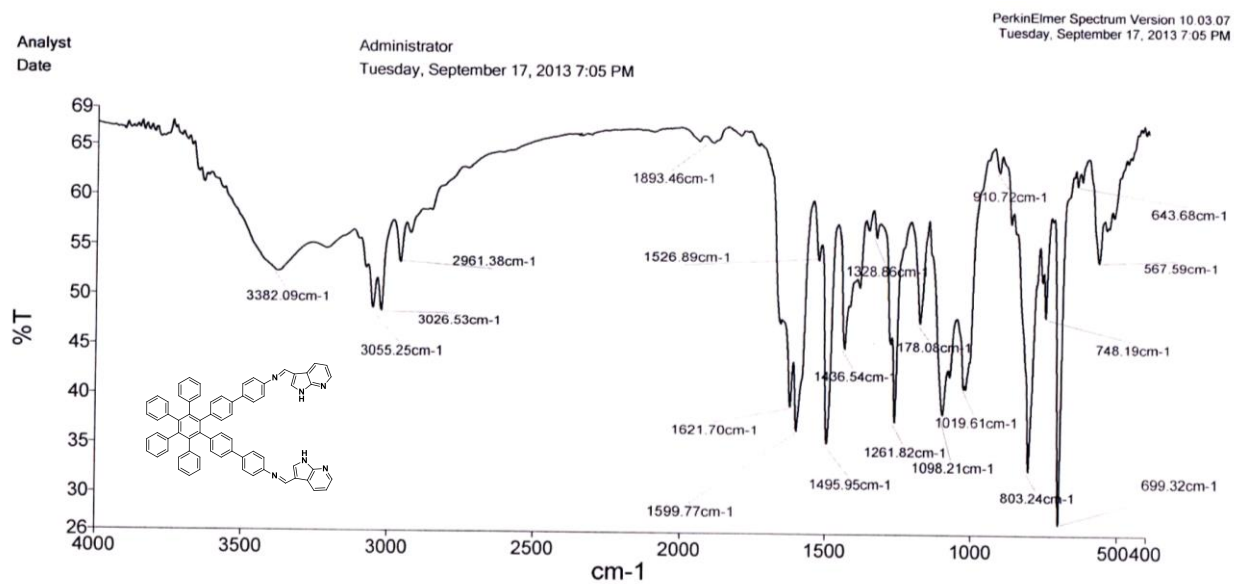

Supplement: c4cc05460a1.pdf [file c4cc05460a1.pdf]
